# Supplementary material for: Modeling demersal fish and benthic invertebrate assemblages in support of marine conservation planning
Source: PubMed Central journal article supplement — Ecol Appl. 2022 Mar 21;32(3):e2546. doi: 10.1002/eap.2546 (PMC9286868; doi:10.1002/eap.2546), 2022-03-21
Supplement: EAP-32-0-s001.pdf [file EAP-32-0-s001.pdf]

**Supporting Information.** O'Brien, J.M., R.R.E. Stanley, N.W. Jeffery, S.G. Heaslip, C. DiBacco, Z. Wang. Modelling demersal fish and benthic invertebrate assemblages in support of marine conservation planning. *Ecological Applications*.

## Appendix S1

**Table S1.** Characteristics of annual multispecies bottom trawl surveys in 4 regions of the Northwest Atlantic including survey timing, fishing vessel, gear characteristics, and fishing protocols. SGSL = Southern Gulf of St. Lawrence, NGSL = Northern Gulf of St. Lawrence, NL = Newfoundland & Labrador, and MAR = Maritimes. NM = nautical miles (1 NM = 1.85 km).

| Region | Survey Timing      | Fishing Vessel                                         | Gear type                  | Codend liner mesh size (mm) | Tow Speed (kn) | Valid Tow Duration (min) | Standard Tow Distance (NM) |
|--------|--------------------|--------------------------------------------------------|----------------------------|-----------------------------|----------------|--------------------------|----------------------------|
| SGSL   | Aug-Oct            | CCGS <i>Teleost</i>                                    | Western IIA box trawl      | 19                          | 3.5            | 30 ± 10                  | 1.75                       |
| NGSL   | Jul-Sep            | CCGS <i>Teleost</i>                                    | Campelen 1800 shrimp trawl | 12.7                        | 3              | 15 ± 5                   | 0.8                        |
| NL     | Apr-Jun<br>Sep-Dec | CCGS <i>Teleost</i> ,<br>CCGS <i>Wilfred Templeman</i> | Campelen 1800 shrimp trawl | 12.7                        | 3              | 15 ± 5                   | 0.8                        |
| MAR    | Feb-Apr<br>Jun-Aug | CCGS <i>Alfred Needler</i><br>CCGS <i>Teleost</i>      | Western IIA box trawl      | 19                          | 3.5            | 30 ± 10                  | 1.75                       |

**Table S2.** List of fish and invertebrate taxa (phyla, taxa name, and taxonomic resolution) included in clustering analyses to identify predominant assemblage types in 4 regions of the Northwest Atlantic (NGSL, SGSL, NL, MAR). All taxa were recorded in > 1% of 4-km grid cells within study area boundaries for all regions indicated. NGSL = Northern Gulf of St. Lawrence, SGSL = Southern Gulf of St. Lawrence, NL = Newfoundland & Labrador, MAR = Maritimes.

| Phylum     | Taxa                                 | Taxonomic resolution | Region              |
|------------|--------------------------------------|----------------------|---------------------|
| Annelida   | <i>Aphrodita hastata</i>             | species              | NGSL, SGSL, MAR     |
| Annelida   | Polychaeta                           | class                | NGSL, SGSL          |
| Arthropoda | <i>Aega psora</i>                    | species              | NGSL                |
| Arthropoda | Amphipoda                            | order                | SGSL                |
| Arthropoda | <i>Anonyx</i> spp.                   | genus                | NGSL                |
| Arthropoda | <i>Arcoscalpellum michelottianum</i> | species              | NGSL                |
| Arthropoda | <i>Argis dentata</i>                 | species              | NGSL, MAR           |
| Arthropoda | <i>Atlantopandalus propinquus</i>    | species              | NGSL, NL, MAR       |
| Arthropoda | Balanidae                            | family               | NGSL                |
| Arthropoda | <i>Calocaris templemani</i>          | species              | NGSL                |
| Arthropoda | <i>Cancer borealis</i>               | species              | MAR                 |
| Arthropoda | <i>Cancer irroratus</i>              | species              | SGSL, MAR           |
| Arthropoda | <i>Chaceon quinquedens</i>           | species              | MAR                 |
| Arthropoda | <i>Chionoecetes opilio</i>           | species              | NGSL, SGSL, NL, MAR |
| Arthropoda | <i>Chirona hameri</i>                | species              | NGSL                |
| Arthropoda | Cirripedia                           | subclass             | SGSL                |
| Arthropoda | <i>Crangon septemspinosa</i>         | species              | MAR                 |
| Arthropoda | <i>Epimeria loricata</i>             | species              | NGSL                |
| Arthropoda | <i>Eualus fabricii</i>               | species              | NGSL                |
| Arthropoda | <i>Eualus gaimardii</i>              | species              | NGSL                |
| Arthropoda | <i>Eualus macilentus</i>             | species              | NGSL                |
| Arthropoda | <i>Eusirus cuspidatus</i>            | species              | NGSL                |
| Arthropoda | <i>Homarus americanus</i>            | species              | SGSL, MAR           |
| Arthropoda | <i>Hyas araneus</i>                  | species              | NGSL, SGSL, MAR     |

|             |                                      |         |                 |
|-------------|--------------------------------------|---------|-----------------|
| Arthropoda  | <i>Hyas coarctatus</i>               | species | NGSL, SGSL, MAR |
| Arthropoda  | Isopoda                              | order   | SGSL            |
| Arthropoda  | <i>Lebbeus groenlandicus</i>         | species | NGSL            |
| Arthropoda  | <i>Lebbeus microceros</i>            | species | NGSL            |
| Arthropoda  | <i>Lebbeus polaris</i>               | species | NGSL, MAR       |
| Arthropoda  | <i>Lithodes maja</i>                 | species | NGSL, SGSL, MAR |
| Arthropoda  | <i>Munidopsis curvirostra</i>        | species | NGSL            |
| Arthropoda  | <i>Neohela monstrosa</i>             | species | NGSL            |
| Arthropoda  | <i>Pagurus</i> spp.                  | genus   | NGSL, SGSL      |
| Arthropoda  | <i>Pandalus borealis</i>             | species | NGSL, NL, MAR   |
| Arthropoda  | <i>Pandalus montagui</i>             | species | NGSL, NL, MAR   |
| Arthropoda  | <i>Paramphithoe hystrix</i>          | species | NGSL            |
| Arthropoda  | <i>Pasiphaea multidentata</i>        | species | MAR             |
| Arthropoda  | <i>Pontophilus norvegicus</i>        | species | NGSL, MAR       |
| Arthropoda  | Pycnogonida                          | class   | NGSL, SGSL      |
| Arthropoda  | <i>Rhachotropis aculeata</i>         | species | NGSL            |
| Arthropoda  | <i>Sabinea sarsii</i>                | species | NGSL            |
| Arthropoda  | <i>Sabinea septemcarinata</i>        | species | NGSL            |
| Arthropoda  | <i>Sclerocrangon boreas</i>          | species | NGSL, MAR       |
| Arthropoda  | <i>Sergestes arcticus</i>            | species | MAR             |
| Arthropoda  | <i>Spirontocaris liljeborgii</i>     | species | NGSL, MAR       |
| Arthropoda  | <i>Spirontocaris phippsii</i>        | species | NGSL            |
| Arthropoda  | <i>Spirontocaris spinus</i>          | species | NGSL, MAR       |
| Arthropoda  | <i>Stegocephalus inflatus</i>        | species | NGSL            |
| Brachiopoda | Brachiopoda                          | phylum  | SGSL            |
| Brachiopoda | <i>Hemithiris psittacea</i>          | species | NGSL            |
| Brachiopoda | <i>Terebratulina septentrionalis</i> | species | NGSL            |
| Bryozoa     | Bryozoa                              | phylum  | NGSL, SGSL      |
| Chordata    | <i>Amblyraja jenseni</i>             | species | NL              |

|          |                                      |         |                     |
|----------|--------------------------------------|---------|---------------------|
| Chordata | <i>Amblyraja radiata</i>             | species | NGSL, SGSL, NL, MAR |
| Chordata | <i>Ammodytes dubius</i>              | species | NL, MAR             |
| Chordata | <i>Ammodytes</i> spp.                | genus   | NGSL, SGSL          |
| Chordata | <i>Anarhichas denticulatus</i>       | species | NL                  |
| Chordata | <i>Anarhichas lupus</i>              | species | NGSL, SGSL, NL, MAR |
| Chordata | <i>Anarhichas minor</i>              | species | NGSL, NL            |
| Chordata | <i>Anisarchus medius</i>             | species | NGSL, SGSL          |
| Chordata | <i>Antimora rostrata</i>             | species | NL, MAR             |
| Chordata | <i>Apristurus profundorum</i>        | species | NL                  |
| Chordata | <i>Arctozenus risso</i>              | species | NGSL, SGSL, MAR     |
| Chordata | <i>Argentina silus</i>               | species | NGSL, NL, MAR       |
| Chordata | <i>Artediellus atlanticus</i>        | species | SGSL, MAR           |
| Chordata | <i>Artediellus</i> spp.              | genus   | NGSL                |
| Chordata | <i>Artediellus uncinatus</i>         | species | SGSL                |
| Chordata | Ascidiacea                           | class   | NGSL, SGSL          |
| Chordata | <i>Aspidophoroides monopterygius</i> | species | NGSL, SGSL, NL, MAR |
| Chordata | <i>Aspidophoroides olrikii</i>       | species | NGSL, SGSL, NL      |
| Chordata | <i>Bathylagus euryops</i>            | species | NL                  |
| Chordata | <i>Bathyraja spinicauda</i>          | species | NGSL, NL            |
| Chordata | <i>Boltenia ovifera</i>              | species | SGSL, MAR           |
| Chordata | <i>Boltenia</i> spp.                 | genus   | NGSL                |
| Chordata | <i>Boreogadus saida</i>              | species | NGSL, NL            |
| Chordata | <i>Brosme brosme</i>                 | species | MAR                 |
| Chordata | <i>Careproctus reinhardti</i>        | species | NGSL, SGSL          |
| Chordata | <i>Centroscyllum fabricii</i>        | species | NGSL, NL, MAR       |
| Chordata | <i>Chauliodus sloani</i>             | species | NL, MAR             |
| Chordata | <i>Chiasmodon niger</i>              | species | NL                  |
| Chordata | <i>Citharichthys arctifrons</i>      | species | MAR                 |
| Chordata | <i>Clupea harengus</i>               | species | NL                  |

|          |                                     |         |                     |
|----------|-------------------------------------|---------|---------------------|
| Chordata | <i>Coryphaenoides rupestris</i>     | species | NL, MAR             |
| Chordata | <i>Cottunculus microps</i>          | species | NGSL, NL            |
| Chordata | <i>Cryptacanthodes maculatus</i>    | species | NGSL, SGSL, NL, MAR |
| Chordata | <i>Cyclopterus lumpus</i>           | species | NGSL, SGSL, NL, MAR |
| Chordata | <i>Cyclothone microdon</i>          | species | NGSL                |
| Chordata | <i>Dipturus laevis</i>              | species | MAR                 |
| Chordata | <i>Enchelyopus cimbrius</i>         | species | NGSL, SGSL, NL, MAR |
| Chordata | <i>Eumesogrammus praecisus</i>      | species | NGSL, SGSL, NL      |
| Chordata | <i>Eumicrotremus spinosus</i>       | species | NGSL, SGSL, NL, MAR |
| Chordata | <i>Gadus morhua</i>                 | species | NGSL, SGSL, NL, MAR |
| Chordata | <i>Gadus ogac</i>                   | species | NGSL, SGSL          |
| Chordata | <i>Gasterosteus aculeatus</i>       | species | NGSL, SGSL          |
| Chordata | <i>Glyptocephalus cynoglossus</i>   | species | NGSL, SGSL, NL, MAR |
| Chordata | <i>Gymnelus viridis</i>             | species | NGSL, SGSL, NL      |
| Chordata | <i>Gymnocanthus tricuspis</i>       | species | NGSL, SGSL, NL      |
| Chordata | <i>Halocynthia pyriformis</i>       | species | SGSL                |
| Chordata | <i>Helicolenus dactylopterus</i>    | species | MAR                 |
| Chordata | <i>Hemitripterus americanus</i>     | species | NGSL, SGSL, NL, MAR |
| Chordata | <i>Hippoglossina oblonga</i>        | species | MAR                 |
| Chordata | <i>Hippoglossoides platessoides</i> | species | NGSL, SGSL, NL, MAR |
| Chordata | <i>Hippoglossus hippoglossus</i>    | species | NGSL, SGSL, NL, MAR |
| Chordata | <i>Icelus bicornis</i>              | species | NGSL                |
| Chordata | <i>Icelus spatula</i>               | species | NGSL, SGSL, NL      |
| Chordata | <i>Leptagonus decagonus</i>         | species | NGSL, SGSL, NL, MAR |
| Chordata | <i>Leptoclinus maculatus</i>        | species | NGSL, SGSL, NL, MAR |
| Chordata | <i>Leucoraja erinacea</i>           | species | MAR                 |
| Chordata | <i>Leucoraja ocellata</i>           | species | SGSL, MAR           |
| Chordata | <i>Limanda ferruginea</i>           | species | NGSL, SGSL, NL, MAR |
| Chordata | <i>Liparis gibbus</i>               | species | NGSL, SGSL          |

|          |                                        |            |                     |
|----------|----------------------------------------|------------|---------------------|
| Chordata | <i>Lophius americanus</i>              | species    | NGSL, NL, MAR       |
| Chordata | <i>Lumpenus lampretaeformis</i>        | species    | NGSL, SGSL, NL, MAR |
| Chordata | <i>Lycenchelys paxillus</i>            | species    | NGSL                |
| Chordata | <i>Lycenchelys verrillii</i>           | species    | NGSL                |
| Chordata | <i>Lycodes esmarkii</i>                | species    | NGSL, NL            |
| Chordata | <i>Lycodes lavalaei</i>                | species    | NGSL, SGSL, MAR     |
| Chordata | <i>Lycodes polaris</i>                 | species    | SGSL                |
| Chordata | <i>Lycodes reticulatus</i>             | species    | NL                  |
| Chordata | <i>Lycodes terraenovae</i>             | species    | NGSL, MAR           |
| Chordata | <i>Lycodes vahlii</i>                  | species    | NGSL, SGSL, NL, MAR |
| Chordata | <i>Macrourus berglax</i>               | species    | NL                  |
| Chordata | <i>Malacoraja senta</i>                | species    | NGSL, SGSL, NL, MAR |
| Chordata | <i>Malacosteus niger</i>               | species    | NL                  |
| Chordata | <i>Melanogrammus aeglefinus</i>        | species    | NGSL, NL, MAR       |
| Chordata | <i>Melanostigma atlanticum</i>         | species    | NGSL, SGSL, NL, MAR |
| Chordata | <i>Merluccius albidus</i>              | species    | MAR                 |
| Chordata | <i>Merluccius bilinearis</i>           | species    | NGSL, SGSL, NL, MAR |
| Chordata | <i>Micromesistius poutassou</i>        | species    | NL                  |
| Chordata | <i>Myoxocephalus aeneus</i>            | species    | SGSL, MAR           |
| Chordata | <i>Myoxocephalus octodecemspinosus</i> | species    | SGSL, NL, MAR       |
| Chordata | <i>Myoxocephalus scorpius</i>          | species    | NGSL, SGSL, NL, MAR |
| Chordata | <i>Myxine glutinosa</i>                | species    | NGSL, SGSL, NL, MAR |
| Chordata | <i>Nemichthys scolopaceus</i>          | species    | NL, MAR             |
| Chordata | <i>Nezumia bairdii</i>                 | species    | NGSL, SGSL, NL, MAR |
| Chordata | <i>Notacanthus chemnitzii</i>          | species    | NL                  |
| Chordata | <i>Paraliparis calidus</i>             | species    | NGSL                |
| Chordata | <i>Paraliparis copei copei</i>         | subspecies | NGSL                |
| Chordata | <i>Peprilus triacanthus</i>            | species    | SGSL, MAR           |
| Chordata | <i>Petromyzon marinus</i>              | species    | MAR                 |

|          |                                      |         |                     |
|----------|--------------------------------------|---------|---------------------|
| Chordata | <i>Phycis chesteri</i>               | species | NGSL, SGSL, NL, MAR |
| Chordata | <i>Pollachius virens</i>             | species | MAR                 |
| Chordata | <i>Polyacanthonotus rissoanus</i>    | species | NL                  |
| Chordata | <i>Polyipnus clarus</i>              | species | NGSL                |
| Chordata | <i>Pseudopleuronectes americanus</i> | species | SGSL, MAR           |
| Chordata | <i>Rajella fyllae</i>                | species | NL                  |
| Chordata | <i>Reinhardtius hippoglossoides</i>  | species | NGSL, SGSL, NL, MAR |
| Chordata | <i>Scophthalmus aquosus</i>          | species | SGSL, MAR           |
| Chordata | <i>Sebastes mentella</i>             | species | NL, MAR             |
| Chordata | <i>Sebastes</i> spp.                 | genus   | NGSL, SGSL          |
| Chordata | <i>Serrivomer beanii</i>             | species | NL, MAR             |
| Chordata | <i>Simenchelys parasitica</i>        | species | NL                  |
| Chordata | <i>Squalus acanthias</i>             | species | MAR                 |
| Chordata | <i>Stichaeus punctatus</i>           | species | SGSL                |
| Chordata | <i>Stomias boa</i>                   | species | NL, MAR             |
| Chordata | <i>Synaphobranchus affinis</i>       | species | MAR                 |
| Chordata | <i>Synaphobranchus kaupii</i>        | species | NL                  |
| Chordata | <i>Tautogolabrus adspersus</i>       | species | SGSL, MAR           |
| Chordata | <i>Trachyrincus murrayi</i>          | species | NL                  |
| Chordata | <i>Triglops murrayi</i>              | species | NGSL, SGSL, MAR     |
| Chordata | <i>Ulvaria subbifurcata</i>          | species | MAR                 |
| Chordata | <i>Urophycis chuss</i>               | species | MAR                 |
| Chordata | <i>Urophycis tenuis</i>              | species | NGSL, SGSL, NL, MAR |
| Chordata | <i>Xenodermichthys copei</i>         | species | NL                  |
| Chordata | <i>Zoarces americanus</i>            | species | NL, SGSL, MAR       |
| Cnidaria | <i>Actinauge cristata</i>            | species | NGSL                |
| Cnidaria | Actiniaria                           | order   | SGSL                |
| Cnidaria | <i>Actinostola callosa</i>           | species | NGSL                |
| Cnidaria | Alcyonacea                           | order   | SGSL                |

|               |                                |         |                 |
|---------------|--------------------------------|---------|-----------------|
| Cnidaria      | <i>Bolocera tuediae</i>        | species | NGSL            |
| Cnidaria      | <i>Epizoanthus erdmanni</i>    | species | NGSL            |
| Cnidaria      | <i>Flabellum alabastrum</i>    | species | NGSL            |
| Cnidaria      | <i>Gersemia rubiformis</i>     | species | NGSL, SGSL, MAR |
| Cnidaria      | <i>Hormathia</i> spp.          | genus   | NGSL            |
| Cnidaria      | Hydrozoa                       | class   | NGSL, SGSL      |
| Cnidaria      | <i>Liponema multicornis</i>    | species | NGSL            |
| Cnidaria      | Nephtheidae                    | family  | NGSL            |
| Cnidaria      | <i>Paragorgia arborea</i>      | species | MAR             |
| Cnidaria      | Pennatulacea                   | order   | NGSL, SGSL      |
| Cnidaria      | <i>Stephanauge nexilis</i>     | species | NGSL            |
| Cnidaria      | <i>Stomphia coccinea</i>       | species | NGSL            |
| Cnidaria      | <i>Urticina felina</i>         | species | NGSL            |
| Echinodermata | <i>Amphiura</i> spp.           | genus   | NGSL            |
| Echinodermata | <i>Asterias forbesi</i>        | species | MAR             |
| Echinodermata | <i>Asterias rubens</i>         | species | SGSL, MAR       |
| Echinodermata | Asteriidae                     | family  | NGSL            |
| Echinodermata | <i>Brisaster fragilis</i>      | species | NGSL, SGSL      |
| Echinodermata | <i>Ceramaster granularis</i>   | species | NGSL, MAR       |
| Echinodermata | <i>Crossaster papposus</i>     | species | NGSL, SGSL, MAR |
| Echinodermata | <i>Ctenodiscus crispatus</i>   | species | NGSL, SGSL, MAR |
| Echinodermata | <i>Cucumaria frondosa</i>      | species | NGSL, SGSL      |
| Echinodermata | <i>Diplopteraster multipes</i> | species | NGSL, MAR       |
| Echinodermata | <i>Echinarachnius parma</i>    | species | NGSL, SGSL, MAR |
| Echinodermata | <i>Gorgonocephalus</i> spp.    | genus   | NGSL, SGSL      |
| Echinodermata | <i>Henricia sanguinolenta</i>  | species | MAR             |
| Echinodermata | <i>Henricia</i> spp.           | genus   | NGSL, SGSL      |
| Echinodermata | <i>Hippasteria phrygiana</i>   | species | NGSL, SGSL, MAR |
| Echinodermata | <i>Leptasterias polaris</i>    | species | MAR             |



|               |                                          |         |                 |
|---------------|------------------------------------------|---------|-----------------|
| Echinodermata | <i>Leptasterias</i> spp.                 | genus   | SGSL            |
| Echinodermata | <i>Ophiacantha</i> spp.                  | genus   | NGSL            |
| Echinodermata | <i>Ophiopholis aculeata</i>              | species | NGSL            |
| Echinodermata | <i>Ophioscolex glacialis</i>             | species | NGSL            |
| Echinodermata | <i>Ophiura sarsi</i>                     | species | MAR             |
| Echinodermata | Ophiurida                                | order   | SGSL            |
| Echinodermata | Ophiuridae                               | family  | NGSL            |
| Echinodermata | Poraniidae                               | family  | NGSL            |
| Echinodermata | <i>Poraniomorpha hispida</i>             | species | MAR             |
| Echinodermata | <i>Pseudarchaster parelii</i>            | species | NGSL, MAR       |
| Echinodermata | <i>Psilaster andromeda</i>               | species | NGSL, SGSL, MAR |
| Echinodermata | <i>Psolus fabricii</i>                   | species | SGSL            |
| Echinodermata | <i>Psolus phantapus</i>                  | species | SGSL            |
| Echinodermata | <i>Psolus</i> spp.                       | genus   | NGSL            |
| Echinodermata | <i>Pteraster militaris</i>               | species | MAR             |
| Echinodermata | <i>Pteraster</i> spp.                    | genus   | NGSL, SGSL      |
| Echinodermata | <i>Solaster endeca</i>                   | species | NGSL, SGSL, MAR |
| Echinodermata | <i>Strongylocentrotus droebachiensis</i> | species | MAR             |
| Echinodermata | <i>Strongylocentrotus</i> spp.           | genus   | NGSL, SGSL      |
| Mollusca      | <i>Aporrhais</i> spp.                    | genus   | NGSL, SGSL      |
| Mollusca      | <i>Arctica islandica</i>                 | species | SGSL, MAR       |
| Mollusca      | <i>Astarte</i> spp.                      | genus   | NGSL, SGSL      |
| Mollusca      | <i>Bathypolypus bairdii</i>              | species | NGSL, SGSL      |
| Mollusca      | <i>Boreotrophon clathratus</i>           | species | NGSL            |
| Mollusca      | Buccinidae                               | family  | NGSL, SGSL      |
| Mollusca      | <i>Buccinum undatum</i>                  | species | MAR             |
| Mollusca      | Cardiidae                                | family  | NGSL, SGSL      |
| Mollusca      | Cephalaspidea                            | order   | NGSL            |
| Mollusca      | <i>Chlamys islandica</i>                 | species | NGSL, SGSL, MAR |

|                 |                                   |         |            |
|-----------------|-----------------------------------|---------|------------|
| Mollusca        | <i>Cuspidaria glacialis</i>       | species | NGSL       |
| Mollusca        | <i>Cyrtodaria siliqua</i>         | species | SGSL       |
| Mollusca        | <i>Doryteuthis pealeii</i>        | species | MAR        |
| Mollusca        | <i>Euspira heros</i>              | species | MAR        |
| Mollusca        | <i>Hiatella arctica</i>           | species | SGSL       |
| Mollusca        | Hiatellidae                       | family  | NGSL       |
| Mollusca        | <i>Macoma calcarea</i>            | species | NGSL       |
| Mollusca        | <i>Margarites</i> spp.            | genus   | NGSL, SGSL |
| Mollusca        | Mytilidae                         | family  | NGSL, SGSL |
| Mollusca        | Naticidae                         | family  | NGSL, SGSL |
| Mollusca        | <i>Neptunea lyrata</i>            | species | MAR        |
| Mollusca        | <i>Nuculana</i> spp.              | genus   | SGSL       |
| Mollusca        | Nuculanida                        | order   | NGSL       |
| Mollusca        | Nudibranchia                      | order   | NGSL, SGSL |
| Mollusca        | <i>Placopecten magellanicus</i>   | species | SGSL, MAR  |
| Mollusca        | Polyplocophora                    | class   | NGSL, SGSL |
| Mollusca        | <i>Rossia</i> spp.                | genus   | NGSL, SGSL |
| Mollusca        | <i>Scabrotrophon fabricii</i>     | species | NGSL       |
| Mollusca        | <i>Semirossia tenera</i>          | species | MAR        |
| Mollusca        | <i>Similipecten greenlandicus</i> | species | NGSL       |
| Platyhelminthes | Platyhelminthes                   | phylum  | NGSL       |
| Porifera        | <i>Biemna variantia</i>           | species | SGSL       |
| Porifera        | <i>Halichondria panicea</i>       | species | SGSL       |
| Porifera        | <i>Halichondria sitiens</i>       | species | SGSL       |
| Porifera        | <i>Haliclona</i> spp.             | genus   | SGSL       |
| Porifera        | <i>Iophon</i> spp.                | genus   | SGSL       |
| Porifera        | <i>Mycale lingua</i>              | species | SGSL       |
| Porifera        | <i>Phakellia</i> spp.             | genus   | SGSL       |
| Porifera        | <i>Polymastia</i> spp.            | genus   | SGSL       |

|           |                                |         |            |
|-----------|--------------------------------|---------|------------|
| Porifera  | Porifera                       | phylum  | NGSL, SGSL |
| Porifera  | <i>Suberites ficus</i>         | species | SGSL       |
| Porifera  | <i>Tentorium semisuberites</i> | species | SGSL       |
| Sipuncula | Sipuncula                      | phylum  | NGSL, SGSL |

---

**Table S3.** Comparison of cophenetic correlation coefficients (*c*) between dendrograms produced using 4 distance/similarity metrics and 7 hierarchical clustering methods on annual trawl survey catch composition data in 4 regions of the Northwest Atlantic: NGSL, SGSL, NL, and MAR (see Table S1 caption for regional abbreviations). Average = unweighted pair-group method using arithmetic averages (UPGMA), McQuitty's = weighted pair-group method using arithmetic averages (WPGMA), centroid = unweighted pair-group method using centroids (UPGMC), median = weighted pair-group method using centroids (WPGMC).

| Clustering Method | Distance/Similarity Metric | Cophenetic Correlation ( <i>c</i> ) |              |              |              |
|-------------------|----------------------------|-------------------------------------|--------------|--------------|--------------|
|                   |                            | NGSL                                | SGSL         | NL           | MAR          |
| average           | Jaccard                    | 0.325                               | 0.403        | 0.284        | 0.316        |
| average           | Soerensen                  | 0.329                               | 0.403        | 0.308        | 0.335        |
| average           | Gower                      | 0.448                               | 0.524        | 0.461        | 0.555        |
| average           | Simpson                    | <b>0.761</b>                        | <b>0.700</b> | <b>0.716</b> | <b>0.585</b> |
| Ward's            | Simpson                    | 0.703                               | 0.557        | 0.672        | 0.529        |
| McQuitty's        | Simpson                    | 0.476                               | 0.573        | 0.648        | 0.514        |
| centroid          | Simpson                    | 0.637                               | 0.552        | 0.673        | 0.334        |
| complete          | Simpson                    | 0.680                               | 0.493        | 0.304        | 0.265        |
| median            | Simpson                    | 0.623                               | 0.437        | 0.373        | 0.410        |
| single            | Simpson                    | 0.337                               | 0.243        | 0.073        | 0.295        |

**Bolded** text indicates highest cophenetic correlations in each region

**Table S4.** Environmental data layers assembled for predictive modelling of spatial distributions of predominant assemblage types for demersal fish and benthic invertebrates in the Northwest Atlantic. For each variable, the summary statistics derived from the input data sources for each 4-km grid cell of the final rasters used in analyses, units of measure, year range of available data, native spatial resolution, and source(s) of input data are provided.

| Variable                         | Summaries                                                                     | Unit                                 | Year range               | Native spatial resolution | Source                             |
|----------------------------------|-------------------------------------------------------------------------------|--------------------------------------|--------------------------|---------------------------|------------------------------------|
| Bottom temperature               | Average mean (annual, spring, summer, fall, winter), min, max, range (annual) | °C                                   | 2007 – 2015              | ~ 3 – 5 arc-min           | Wang et al. 2018                   |
| Sea surface temperature (SST)    | Average mean (annual, spring, summer, fall, winter), min, max, range (annual) | °C                                   | 2007 – 2015              | ~ 3 – 5 arc-min           | Wang et al. 2018                   |
| Bottom salinity                  | Average mean (annual, spring, summer, fall, winter), min, max, range (annual) | psu                                  | 2007 – 2015              | ~ 3 – 5 arc-min           | Wang et al. 2018                   |
| Bottom shear stress              | Average mean (annual)                                                         | N m <sup>-2</sup>                    | 2007 – 2015              | ~ 3 – 5 arc-min           | Wang et al. 2018                   |
| Bottom current velocity N-S      | Average mean, max (annual)                                                    | m s <sup>-1</sup>                    | 2007 – 2015              | ~ 3 – 5 arc-min           | Wang et al. 2018                   |
| Bottom current velocity E-W      | Average mean, max (annual)                                                    | m s <sup>-1</sup>                    | 2007 – 2015              | ~ 3 – 5 arc-min           | Wang et al. 2018                   |
| Mixed layer depth (MLD)          | Average mean (annual, summer)                                                 | m                                    | 2007 – 2015              | ~ 3 – 5 arc-min           | Wang et al. 2018                   |
| Surface chlorophyll <i>a</i>     | Average mean (annual, spring, summer, fall, winter), min, max, range (annual) | mg m <sup>-3</sup>                   | 2007 – 2011, 2012 – 2016 | 37.5 arc-sec              | Fisheries and Oceans Canada 2021b  |
| Primary production (PP)          | Average mean, max (annual, spring/summer)                                     | mg C m <sup>-2</sup> d <sup>-1</sup> | 2007 – 2016              | 2.5 arc-min               | Fisheries and Oceans Canada 2021a* |
| Depth                            | NA                                                                            | m                                    | NA                       | 15 arc-sec, 30 arc-sec    | CHS 2004, GEBCO 2014               |
| Slope                            | NA                                                                            | degrees                              | NA                       | 15 arc-sec, 30 arc-sec    | CHS 2004, GEBCO 2014               |
| Aspect                           | NA                                                                            | degrees                              | NA                       | 15 arc-sec, 30 arc-sec    | CHS 2004, GEBCO 2014               |
| Bathymetric Position Index (BPI) | 0.5 km, 1 km, 2 km, 5 km, 10 km, 20 km                                        | NA                                   | NA                       | 15 arc-sec, 30 arc-sec    | CHS 2004, GEBCO 2014               |
| Dissolved oxygen (DO)            | mean                                                                          | mg l <sup>-1</sup>                   | 1898 – 2009              | 5 arc-min                 | Tyberghein et al. 2012             |
| pH                               | mean                                                                          | NA                                   | 1910 – 2007              | 5 arc-min                 | Tyberghein et al. 2012             |
| Nitrate                          | mean                                                                          | μmol l <sup>-1</sup>                 | 1928 – 2008              | 5 arc-min                 | Tyberghein et al. 2012             |
| Phosphate                        | mean                                                                          | μmol l <sup>-1</sup>                 | 1922 – 1986              | 5 arc-min                 | Tyberghein et al. 2012             |
| Silicate                         | mean                                                                          | μmol l <sup>-1</sup>                 | 1930 – 2008              | 5 arc-min                 | Tyberghein et al. 2012             |

\*Depth-integrated net primary production provided by Remote Sensing Unit at the Bedford Institute of Oceanography, Dartmouth, NS. Estimated using data from multiple sources using methods described in Platt et al. 2008

**Table S5.** Final sets of environmental predictor variables included in random forest models classifying assemblage types in each of 4 regions of the Northwest Atlantic: NGSL, SGSL, NL, and MAR (see Table S1 caption for regional abbreviations). BPI = Bathymetric Position Index, SST = Sea Surface Temperature,  $\checkmark$  = variable included in regional model. Pairwise correlations are  $\leq 0.7$  between all variables in a regional model.

| Variable                                  | NGSL         | SGSL         | NL           | MAR          |
|-------------------------------------------|--------------|--------------|--------------|--------------|
| Aspect                                    | $\checkmark$ | $\checkmark$ | $\checkmark$ | $\checkmark$ |
| BPI (0.5 km)                              |              |              | $\checkmark$ | $\checkmark$ |
| BPI (1 km)                                | $\checkmark$ | $\checkmark$ |              |              |
| BPI (10 km)                               |              |              |              | $\checkmark$ |
| BPI (20 km)                               | $\checkmark$ | $\checkmark$ | $\checkmark$ |              |
| Bottom current velocity E-W (max annual)  |              |              | $\checkmark$ |              |
| Bottom current velocity E-W (mean annual) | $\checkmark$ | $\checkmark$ | $\checkmark$ |              |
| Bottom current velocity N-S (max annual)  |              | $\checkmark$ | $\checkmark$ |              |
| Bottom current velocity N-S (mean annual) | $\checkmark$ | $\checkmark$ |              |              |
| Bottom salinity (max annual)              |              |              |              | $\checkmark$ |
| Bottom salinity (range annual)            |              |              | $\checkmark$ |              |
| Bottom shear stress (mean annual)         | $\checkmark$ | $\checkmark$ | $\checkmark$ | $\checkmark$ |
| Bottom temperature (max annual)           | $\checkmark$ | $\checkmark$ | $\checkmark$ | $\checkmark$ |
| Bottom temperature (mean annual)          |              | $\checkmark$ |              |              |
| Bottom temperature (min annual)           | $\checkmark$ | $\checkmark$ | $\checkmark$ | $\checkmark$ |
| Chlorophyll <i>a</i> (min annual)         |              |              | $\checkmark$ |              |
| Chlorophyll <i>a</i> (mean fall)          |              |              | $\checkmark$ |              |
| Chlorophyll <i>a</i> (mean spring)        |              |              | $\checkmark$ |              |
| Chlorophyll <i>a</i> (mean summer)        |              |              | $\checkmark$ |              |
| Chlorophyll <i>a</i> (mean winter)        | $\checkmark$ |              | $\checkmark$ |              |
| Depth                                     |              |              | $\checkmark$ | $\checkmark$ |
| Dissolved oxygen                          | $\checkmark$ |              | $\checkmark$ | $\checkmark$ |
| Mixed layer depth (mean annual)           | $\checkmark$ | $\checkmark$ | $\checkmark$ |              |
| Mixed layer depth (mean summer)           |              | $\checkmark$ |              |              |
| pH                                        | $\checkmark$ |              | $\checkmark$ |              |
| Primary production (max spring/summer)    | $\checkmark$ | $\checkmark$ | $\checkmark$ | $\checkmark$ |
| Primary production (mean annual)          |              |              | $\checkmark$ |              |
| SST (max annual)                          | $\checkmark$ |              |              |              |
| SST (mean winter)                         |              | $\checkmark$ |              |              |
| SST (min annual)                          | $\checkmark$ | $\checkmark$ |              |              |
| Slope                                     | $\checkmark$ | $\checkmark$ | $\checkmark$ | $\checkmark$ |

**Table S6.** Scientific name, common name, frequency of occurrence (Freq = % grid cells occupied) and indicator value (IndVal) for taxa characterizing predominant assemblages of demersal fish and benthic invertebrates in each of 4 regions of the Northwest Atlantic: NGSL, SGSL, NL, and MAR (see Table S1 caption for regional abbreviations). IndVal for all taxa listed are significant at  $\alpha = 0.05$ .

| Assemblage              | Taxa                                | Common name                 | Freq (%)    | IndVal       |
|-------------------------|-------------------------------------|-----------------------------|-------------|--------------|
| <b>NGSL</b>             |                                     |                             |             |              |
| Deep Channels           | <i>Nezumia bairdii</i>              | Marlin-spike Grenadier      | 93.3        | 0.793        |
|                         | <i>Myxine glutinosa</i>             | Northern Hagfish            | 93.1        | 0.707        |
|                         | <i>Brisaster fragilis</i>           | Heart Urchin                | 82.1        | 0.664        |
|                         | <i>Arctozenus risso</i>             | White (Spotted) Barracudina | 93.2        | 0.647        |
|                         | <i>Malacoraja senta</i>             | Smooth Skate                | 92.1        | 0.507        |
|                         | <i>Reinhardtius hippoglossoides</i> | Greenland Halibut (Turbot)  | 97.0        | 0.489        |
|                         | Pennatulacea                        | Sea Pens                    | 88.5        | 0.483        |
|                         | <i>Enchelyopus cimbrius</i>         | Fourbeard Rockling          | 88.0        | 0.472        |
|                         | <i>Lithodes maja</i>                | Northern Stone Crab         | 57.3        | 0.458        |
|                         | <i>Glyptocephalus cynoglossus</i>   | Witch Flounder              | 98.3        | 0.451        |
|                         | <i>Pandalus borealis</i>            | Northern Shrimp             | 99.2        | 0.435        |
|                         | <i>Melanostigma atlanticum</i>      | Atlantic Soft Pout          | 56.1        | 0.427        |
|                         | <i>Bolocera tuediae</i>             | Deeplet Sea Anemone         | 67.2        | 0.424        |
|                         | <i>Urophycis tenuis</i>             | White Hake                  | 63.9        | 0.417        |
|                         | <i>Amblyraja radiata</i>            | Thorny Skate                | 94.8        | 0.405        |
|                         | <i>Sebastes</i> spp.                | Unseparated Redfishes       | 99.7        | 0.404        |
|                         | <i>Pontophilus norvegicus</i>       | Norwegian Shrimp            | 56.3        | 0.398        |
|                         | <i>Phycis chesteri</i>              | Longfin Hake                | 39.2        | 0.371        |
|                         | <i>Bathypolypus bairdii</i>         | North Atlantic Octopus      | 41.5        | 0.285        |
|                         |                                     | <b>Mean</b>                 |             | <b>79.0</b>  |
|                         | <b>Max</b>                          |                             | <b>99.7</b> | <b>0.793</b> |
| Shallow Banks & Straits | <i>Triglops murrayi</i>             | Moustache Sculpin           | 94.4        | 0.656        |
|                         | <i>Crossaster papposus</i>          | Spiny Sunstar               | 74.9        | 0.649        |
|                         | <i>Strongylocentrotus</i> spp.      | Sea Urchins                 | 93.7        | 0.636        |
|                         | <i>Eumicrotremus spinosus</i>       | Atlantic Spiny Lump sucker  | 70.7        | 0.594        |
|                         | <i>Spirontocaris spinus</i>         | Parrot Shrimp               | 62.7        | 0.573        |
|                         | <i>Eumesogrammus praecisus</i>      | Fourline Snakeblenny        | 66.9        | 0.559        |
|                         | <i>Pandalus montagui</i>            | Striped Pink (Aesop) Shrimp | 98.3        | 0.507        |
|                         | <i>Myoxocephalus scorpius</i>       | Shorthorn Sculpin           | 64.8        | 0.489        |
|                         | <i>Hyas coarctatus</i>              | Arctic Lyre (Toad) Crab     | 72.5        | 0.475        |
|                         | <i>Argis dentata</i>                | Arctic Argid                | 68.3        | 0.474        |
|                         | <i>Lebbeus polaris</i>              | Polar Lebbeid shrimp        | 72.8        | 0.474        |
|                         | <i>Gadus morhua</i>                 | Atlantic Cod                | 99.0        | 0.434        |
|                         | <i>Henricia</i> spp.                | Blood Stars                 | 78.0        | 0.423        |
|                         | <i>Gersemia rubiformis</i>          | Sea Strawberry              | 58.5        | 0.405        |
|                         | <i>Sabinea septemcarinata</i>       | Sevenline Shrimp            | 55.1        | 0.404        |
|                         | Asteriidae                          | Asterid Sea Stars           | 50.9        | 0.389        |
|                         | <i>Ophiopholis aculeata</i>         | Daisy Brittle Star          | 58.5        | 0.362        |
|                         | <i>Rhachotropis aculeata</i>        | Eusirid Amphipod            | 41.1        | 0.356        |

|                                      |                                      |                           |             |              |
|--------------------------------------|--------------------------------------|---------------------------|-------------|--------------|
|                                      | <i>Hyas araneus</i>                  | Atlantic Lyre Crab        | 42.5        | 0.347        |
|                                      | <i>Pteraster</i> spp.                | Pterasterid Cushion Stars | 47.0        | 0.345        |
|                                      | <i>Aspidophoroides monopterygius</i> | Alligatorfish             | 62.4        | 0.341        |
|                                      | <i>Gorgonocephalus</i> spp.          | Basket Stars              | 51.2        | 0.339        |
|                                      | Porifera                             | Sponges                   | 86.4        | 0.332        |
|                                      | <i>Chlamys islandica</i>             | Iceland Scallop           | 39.0        | 0.332        |
|                                      | <i>Sclerocrangon boreas</i>          | Sculptured Shrimp         | 35.2        | 0.325        |
|                                      | <i>Eualus fabricii</i>               | Arctic Eualid             | 35.2        | 0.312        |
|                                      | <i>Lebbeus groenlandicus</i>         | Spiny Lebbeid Shrimp      | 32.8        | 0.310        |
|                                      | <i>Lycodes lavalaei</i>              | Newfoundland Eelpout      | 45.6        | 0.300        |
|                                      | <i>Stomphia coccinea</i>             | Swimming Anemone          | 46.3        | 0.298        |
|                                      | Polychaeta                           | Bristle Worms             | 72.1        | 0.297        |
|                                      | <i>Boltenia</i> spp.                 | Sea Potatoes              | 39.4        | 0.297        |
|                                      | <i>Pagurus</i> spp.                  | Hermit Crabs              | 39.4        | 0.297        |
|                                      | <i>Anarhichas lupus</i>              | Atlantic Wolffish         | 48.4        | 0.265        |
|                                      | Ophiuridae                           | Ophiurid brittle stars    | 58.9        | 0.253        |
|                                      |                                      | <b>Mean</b>               | <b>60.7</b> | <b>0.407</b> |
|                                      |                                      | <b>Max</b>                | <b>99.0</b> | <b>0.656</b> |
| Channel Heads<br>& Slopes            | <i>Lycodes vahlii</i>                | Checker (Vahl's) Eelpout  | 68.4        | 0.507        |
|                                      | <i>Ctenodiscus crispatus</i>         | Mud Star                  | 85.0        | 0.396        |
|                                      | <i>Chionoecetes opilio</i>           | Snow Crab                 | 84.8        | 0.382        |
|                                      | <i>Hippoglossoides platessoides</i>  | American Plaice           | 99.8        | 0.370        |
|                                      | <i>Hippoglossus hippoglossus</i>     | Atlantic Halibut          | 54.4        | 0.347        |
|                                      | <i>Lumpenus lampretaeformis</i>      | Snakeblenny               | 50.7        | 0.332        |
|                                      | <i>Leptoclinus maculatus</i>         | Daubed Shanny             | 64.5        | 0.326        |
|                                      |                                      | <b>Mean</b>               | <b>72.5</b> | <b>0.380</b> |
|                                      |                                      | <b>Max</b>                | <b>99.8</b> | <b>0.507</b> |
| <b>SGSL</b>                          |                                      |                           |             |              |
| Magdalen<br>Shallows/<br>Chaleur Bay | <i>Gorgonocephalus</i> spp.          | Basket Stars              | 80.3        | 0.419        |
|                                      | Buccinidae                           | Whelks                    | 75.6        | 0.415        |
|                                      | <i>Crossaster papposus</i>           | Spiny Sunstar             | 91.5        | 0.403        |
|                                      | <i>Hyas coarctatus</i>               | Arctic Lyre (Toad) Crab   | 83.4        | 0.389        |
|                                      | <i>Chionoecetes opilio</i>           | Snow Crab                 | 97.4        | 0.385        |
|                                      | <i>Strongylocentrotus</i> spp.       | Sea Urchins               | 90.2        | 0.383        |
|                                      | <i>Pagurus</i> spp.                  | Hermit Crabs              | 66.9        | 0.365        |
|                                      | <i>Lycodes lavalaei</i>              | Newfoundland Eelpout      | 39.7        | 0.346        |
|                                      | <i>Boltenia ovifera</i>              | Sea Potato                | 69.0        | 0.319        |
|                                      | <i>Hippoglossoides platessoides</i>  | American Plaice           | 99.0        | 0.310        |
|                                      | <i>Gadus morhua</i>                  | Atlantic Cod              | 86.8        | 0.299        |
|                                      | <i>Leptagonus decagonus</i>          | Atlantic Sea Poacher      | 32.2        | 0.281        |
|                                      | <i>Leptoclinus maculatus</i>         | Daubed Shanny             | 60.0        | 0.272        |
|                                      | <i>Icelus spatula</i>                | Spatulate Sculpin         | 32.5        | 0.261        |
|                                      |                                      | <b>Mean</b>               | <b>71.8</b> | <b>0.346</b> |
|                                      |                                      | <b>Max</b>                | <b>99.0</b> | <b>0.419</b> |
| Inshore/<br>Magdalen Is.             | <i>Limanda ferruginea</i>            | Yellowtail Flounder       | 86.5        | 0.387        |
|                                      | <i>Echinarachnius parma</i>          | Sand Dollar               | 71.6        | 0.343        |
|                                      | <i>Cucumaria frondosa</i>            | Common Sea Cucumber       | 54.9        | 0.284        |



|                                            |                                        |                             |             |              |
|--------------------------------------------|----------------------------------------|-----------------------------|-------------|--------------|
|                                            | <i>Leptasterias</i> spp.               | Six-rayed Sea Stars         | 64.2        | 0.270        |
|                                            | <i>Hyas araneus</i>                    | Atlantic Lyre Crab          | 59.1        | 0.258        |
|                                            |                                        | <b>Mean</b>                 | <b>67.3</b> | <b>0.308</b> |
|                                            |                                        | <b>Max</b>                  | <b>86.5</b> | <b>0.387</b> |
| Laurentian Channel                         | <i>Glyptocephalus cynoglossus</i>      | Witch Flounder              | 97.7        | 0.826        |
|                                            | <i>Sebastes</i> spp.                   | Unseparated Redfishes       | 99.2        | 0.725        |
|                                            | <i>Myxine glutinosa</i>                | Northern Hagfish            | 73.7        | 0.720        |
|                                            | <i>Lithodes maja</i>                   | Northern Stone Crab         | 69.2        | 0.680        |
|                                            | <i>Amblyraja radiata</i>               | Thorny Skate                | 82.0        | 0.586        |
|                                            | <i>Reinhardtius hippoglossoides</i>    | Greenland Halibut (Turbot)  | 82.7        | 0.576        |
|                                            | <i>Nezumia bairdii</i>                 | Marlin-spike Grenadier      | 57.9        | 0.576        |
|                                            | Pennatulacea                           | Sea Pens                    | 69.2        | 0.570        |
|                                            | <i>Malacoraja senta</i>                | Smooth Skate                | 60.2        | 0.562        |
|                                            | <i>Hippasteria phrygiana</i>           | Horse Star                  | 62.4        | 0.546        |
|                                            | <i>Arctozenus risso</i>                | White (Spotted) Barracudina | 57.9        | 0.546        |
|                                            | <i>Urophycis tenuis</i>                | White Hake                  | 86.5        | 0.413        |
|                                            | <i>Melanostigma atlanticum</i>         | Atlantic Soft Pout          | 41.4        | 0.402        |
|                                            | <i>Bathypolypus bairdii</i>            | North Atlantic Octopus      | 42.1        | 0.390        |
|                                            | <i>Brisaster fragilis</i>              | Heart Urchin                | 36.8        | 0.364        |
|                                            | <i>Hippoglossus hippoglossus</i>       | Atlantic Halibut            | 56.4        | 0.304        |
|                                            | Actiniaria                             | Sea Anemones                | 85.7        | 0.298        |
|                                            | <i>Ctenodiscus crispatus</i>           | Mud Star                    | 54.9        | 0.286        |
|                                            | <i>Rossia</i> spp.                     | Bobtail Squid               | 31.6        | 0.277        |
|                                            |                                        |                             | <b>Mean</b> | <b>65.7</b>  |
|                                            |                                        | <b>Max</b>                  | <b>99.2</b> | <b>0.826</b> |
| Northumberland Strait/<br>St. George's Bay | <i>Homarus americanus</i>              | American Lobster            | 60.5        | 0.558        |
|                                            | <i>Cancer irroratus</i>                | Atlantic Rock Crab          | 70.2        | 0.556        |
|                                            | <i>Scophthalmus aquosus</i>            | Brill (Windowpane) Flounder | 4.70        | 0.533        |
|                                            | <i>Gasterosteus aculeatus</i>          | Threespine Stickleback      | 11.2        | 0.527        |
|                                            | <i>Pseudopleuronectes americanus</i>   | Winter Flounder             | 92.6        | 0.497        |
|                                            | <i>Myoxocephalus octodecemspinosus</i> | Longhorn Sculpin            | 60.5        | 0.374        |
|                                            | <i>Tautoglabrus adspersus</i>          | Cunner                      | 15.8        | 0.260        |
|                                            |                                        | <b>Mean</b>                 | <b>45.1</b> | <b>0.472</b> |
|                                            |                                        | <b>Max</b>                  | <b>92.6</b> | <b>0.558</b> |
| <b>NL</b>                                  |                                        |                             |             |              |
| Inner Shelf                                | <i>Boreogadus saida</i>                | Polar Cod                   | 67.6        | 0.464        |
|                                            | <i>Icelus spatula</i>                  | Spatulate Sculpin           | 49.6        | 0.390        |
|                                            | <i>Pandalus montagui</i>               | Striped Pink (Aesop) Shrimp | 84.4        | 0.354        |
|                                            | <i>Chionoectes opilio</i>              | Snow Crab                   | 89.1        | 0.333        |
|                                            | <i>Leptoclinus maculatus</i>           | Daubed Shanny               | 47.5        | 0.332        |
|                                            | <i>Leptagonus decagonus</i>            | Atlantic Sea Poacher        | 47.8        | 0.270        |
|                                            | <i>Lycodes reticulatus</i>             | Arctic Eelpout              | 52.1        | 0.266        |
|                                            |                                        |                             | <b>Mean</b> | <b>62.6</b>  |
|                                            |                                        | <b>Max</b>                  | <b>89.1</b> | <b>0.464</b> |
| Outer Shelf                                | <i>Pandalus borealis</i>               | Northern Shrimp             | 84.8        | 0.375        |
|                                            | <i>Anarhichas lupus</i>                | Striped Atlantic Wolffish   | 58.3        | 0.282        |

|                                    |                                        |                            |             |              |
|------------------------------------|----------------------------------------|----------------------------|-------------|--------------|
|                                    | <i>Amblyraja radiata</i>               | Thorny Skate               | 91.1        | 0.277        |
|                                    | <i>Anarhichas minor</i>                | Spotted Wolffish           | 41.6        | 0.276        |
|                                    |                                        | <b>Mean</b>                | <b>69.0</b> | <b>0.302</b> |
|                                    |                                        | <b>Max</b>                 | <b>91.1</b> | <b>0.375</b> |
| Grand Banks                        | <i>Limanda ferruginea</i>              | Yellowtail Flounder        | 95.5        | 0.839        |
|                                    | <i>Ammodytes dubius</i>                | Northern Sand Lance        | 74.2        | 0.528        |
|                                    | <i>Myoxocephalus octodecemspinosus</i> | Longhorn Sculpin           | 35.9        | 0.313        |
|                                    |                                        | <b>Mean</b>                | <b>68.5</b> | <b>0.560</b> |
|                                    |                                        | <b>Max</b>                 | <b>95.5</b> | <b>0.839</b> |
| Slope                              | <i>Antimora rostrata</i>               | Blue Antimora              | 89.6        | 0.825        |
|                                    | <i>Coryphaenoides rupestris</i>        | Rock (Roundnose) Grenadier | 83.3        | 0.789        |
|                                    | <i>Synaphobranchus kaupii</i>          | Gray's Cutthroat Eel       | 94.5        | 0.659        |
|                                    | <i>Macrourus berglax</i>               | Roughhead Grenadier        | 98.5        | 0.649        |
|                                    | <i>Notacanthus chemnitzii</i>          | Spiny Eel                  | 59.8        | 0.540        |
|                                    | <i>Chauliodus sloani</i>               | Viperfish                  | 58.4        | 0.500        |
|                                    | <i>Stomias boa</i>                     | Boa Dragonfish             | 69.9        | 0.497        |
|                                    | <i>Bathylagus euryops</i>              | Goiter Blacksmelt          | 48.7        | 0.469        |
|                                    | <i>Nezumia bairdii</i>                 | Marlin-spike Grenadier     | 90.5        | 0.454        |
|                                    | <i>Serrivomer beanii</i>               | Stout Sawpalate            | 46.2        | 0.424        |
|                                    | <i>Reinhardtius hippoglossoides</i>    | Greenland Halibut (Turbot) | 95.1        | 0.320        |
|                                    | <i>Malacosteus niger</i>               | Spotlight Loosejaw         | 29.6        | 0.286        |
|                                    | <i>Polyacanthonotus rissoanus</i>      | Shortspine Tapirfish       | 29.2        | 0.280        |
|                                    | <i>Atlantopandalus propinquus</i>      | Deep-sea Shrimp            | 37.5        | 0.272        |
|                                    | <i>Anarhichas denticulatus</i>         | Northern Wolffish          | 44.7        | 0.269        |
|                                    | <i>Chiasmodon niger</i>                | Black Swallower            | 30.3        | 0.265        |
|                                    |                                        | <b>Mean</b>                | <b>62.9</b> | <b>0.469</b> |
|                                    |                                        | <b>Max</b>                 | <b>74.1</b> | <b>0.825</b> |
| Laurentian Channel/<br>Shelf Break | <i>Urophycis tenuis</i>                | White Hake                 | 82.9        | 0.667        |
|                                    | <i>Merluccius bilinearis</i>           | Silver Hake                | 75.3        | 0.642        |
|                                    | <i>Myxine glutinosa</i>                | Northern Hagfish           | 66.5        | 0.555        |
|                                    | <i>Argentina silus</i>                 | Atlantic Argentine         | 46.9        | 0.414        |
|                                    | <i>Lophius americanus</i>              | Monkfish                   | 43.6        | 0.380        |
|                                    | <i>Glyptocephalus cynoglossus</i>      | Witch Flounder             | 92.7        | 0.374        |
|                                    | <i>Phycis chesteri</i>                 | Longfin Hake               | 65.8        | 0.373        |
|                                    | <i>Malacoraja senta</i>                | Smooth Skate               | 45.5        | 0.342        |
|                                    | <i>Sebastes mentella</i>               | Beaked Redfish             | 93.1        | 0.328        |
|                                    | <i>Enchelyopus cimbrius</i>            | Fourbeard Rockling         | 37.8        | 0.254        |
|                                    |                                        | <b>Mean</b>                | <b>65.0</b> | <b>0.433</b> |
|                                    |                                        | <b>Max</b>                 | <b>93.1</b> | <b>0.667</b> |
| <b>MAR</b>                         |                                        |                            |             |              |
| WSS/Outer BoF                      | <i>Urophycis chuss</i>                 | Squirrel (Red) Hake        | 59.1        | 0.331        |
|                                    | <i>Pollachius virens</i>               | Pollock                    | 59.2        | 0.293        |
|                                    | <i>Merluccius bilinearis</i>           | Silver Hake                | 85.0        | 0.263        |
|                                    |                                        | <b>Mean</b>                | <b>67.8</b> | <b>0.296</b> |
|                                    |                                        | <b>Max</b>                 | <b>85.0</b> | <b>0.331</b> |

|                                       |                                          |                             |              |              |
|---------------------------------------|------------------------------------------|-----------------------------|--------------|--------------|
| WSS: Banks/<br>Inner BoF              | <i>Placopecten magellanicus</i>          | Atlantic Deep Sea Scallop   | 62.6         | 0.402        |
|                                       | <i>Pseudopleuronectes americanus</i>     | Winter Flounder             | 56.2         | 0.400        |
|                                       | <i>Leucoraja erinacea</i>                | Little Skate                | 47.9         | 0.377        |
|                                       | <i>Myoxocephalus octodecemspinosus</i>   | Longhorn Sculpin            | 73.1         | 0.335        |
|                                       | <i>Melanogrammus aeglefinus</i>          | Atlantic Haddock            | 90.7         | 0.318        |
|                                       | <i>Limanda ferruginea</i>                | Yellowtail Flounder         | 67.4         | 0.282        |
|                                       | <i>Homarus americanus</i>                | American Lobster            | 55.6         | 0.270        |
|                                       | <i>Leucoraja ocellata</i>                | Winter Skate                | 45.1         | 0.261        |
|                                       | <i>Hemitripterus americanus</i>          | Sea Raven                   | 53.1         | 0.260        |
|                                       |                                          | <b>Mean</b>                 | <b>61.3</b>  | <b>0.323</b> |
|                                       | <b>Max</b>                               | <b>90.7</b>                 | <b>0.402</b> |              |
| ESS                                   | <i>Lycodes vahlii</i>                    | Checker (Vahl's) Eelpout    | 40.2         | 0.310        |
|                                       | <i>Pandalus borealis</i>                 | Northern Shrimp             | 69.6         | 0.307        |
|                                       | <i>Hippoglossoides platessoides</i>      | American Plaice             | 94.2         | 0.275        |
|                                       | <i>Glyptocephalus cynoglossus</i>        | Witch Flounder              | 92.4         | 0.274        |
|                                       |                                          | <b>Mean</b>                 | <b>74.1</b>  | <b>0.292</b> |
|                                       | <b>Max</b>                               | <b>94.2</b>                 | <b>0.310</b> |              |
| ESS: Banks                            | <i>Strongylocentrotus droebachiensis</i> | Green Sea Urchin            | 79.8         | 0.516        |
|                                       | <i>Ammodytes dubius</i>                  | Northern Sand Lance         | 58.5         | 0.394        |
|                                       | <i>Chionoecetes opilio</i>               | Snow Crab                   | 81.8         | 0.331        |
|                                       | <i>Echinarachnius parma</i>              | Sand Dollar                 | 59.6         | 0.284        |
|                                       | <i>Crossaster papposus</i>               | Spiny Sunstar               | 61.4         | 0.278        |
|                                       | <i>Hyas coarctatus</i>                   | Arctic Lyre (Toad) Crab     | 39.4         | 0.269        |
|                                       |                                          | <b>Mean</b>                 | <b>63.4</b>  | <b>0.345</b> |
|                                       | <b>Max</b>                               | <b>81.8</b>                 | <b>0.516</b> |              |
| Laurentian<br>Channel/<br>Shelf Break | <i>Phycis chesteri</i>                   | Longfin Hake                | 85.0         | 0.502        |
|                                       | <i>Sebastes mentella</i>                 | Beaked Redfish              | 100          | 0.323        |
|                                       | <i>Arctozenus risso</i>                  | White (Spotted) Barracudina | 58.8         | 0.298        |
|                                       | <i>Urophycis tenuis</i>                  | White Hake                  | 77.8         | 0.283        |
|                                       |                                          | <b>Mean</b>                 | <b>80.4</b>  | <b>0.352</b> |
|                                       | <b>Max</b>                               | <b>100</b>                  | <b>0.502</b> |              |
| Slope                                 | <i>Synaphobranchus affinis</i>           | Cutthroat Eel               | 94.3         | 0.850        |
|                                       | <i>Chauliodus sloani</i>                 | Viperfish                   | 74.3         | 0.703        |
|                                       | <i>Serrivomer beanii</i>                 | Stout Sawpalate             | 71.4         | 0.701        |
|                                       | <i>Stomias boa</i>                       | Boa Dragonfish              | 80.0         | 0.683        |
|                                       | <i>Antimora rostrata</i>                 | Blue Antimora               | 65.7         | 0.638        |
|                                       | <i>Coryphaenoides rupestris</i>          | Rock (Roundnose) Grenadier  | 57.1         | 0.554        |
|                                       | <i>Centroscyllium fabricii</i>           | Black Dogfish               | 68.6         | 0.517        |
|                                       | <i>Nemichthys scolopaceus</i>            | Slender Snipe Eel           | 48.6         | 0.394        |
|                                       | <i>Chaceon quinquegens</i>               | Red Deep Sea Crab           | 51.4         | 0.367        |
|                                       | <i>Reinhardtius hippoglossoides</i>      | Greenland Halibut (Turbot)  | 80.0         | 0.299        |
|                                       | <i>Nezumia bairdii</i>                   | Marlin-spike Grenadier      | 65.7         | 0.298        |
|                                       |                                          | <b>Mean</b>                 | <b>68.8</b>  | <b>0.546</b> |
|                                       |                                          | <b>Max</b>                  | <b>94.3</b>  | <b>0.850</b> |

**Table S7.** Class-specific performance of random forest classifier for Maritimes region when hindcasting the expected assemblage type at sites (i.e., 4-km grid cells) with repeated measures in two time periods (2007 – 2011, 2012 – 2016) based on environmental conditions in those time periods. Sensitivity (true positive rate), specificity (true negative rate), precision, and prevalence calculated from the confusion matrix for both time periods combined are provided for each of the 6 predominant assemblage types in the region.

| Assemblage                     | Sensitivity | Specificity | Precision | Prevalence |
|--------------------------------|-------------|-------------|-----------|------------|
| WSS/Outer BoF                  | 0.655       | 0.905       | 0.685     | 0.239      |
| WSS: Banks/Inner BoF           | 0.794       | 0.855       | 0.848     | 0.504      |
| ESS                            | 0.679       | 0.962       | 0.528     | 0.059      |
| ESS: Banks                     | 0.775       | 0.941       | 0.729     | 0.169      |
| Laurentian Channel/Shelf Break | 0.667       | 0.978       | 0.444     | 0.025      |
| Slope                          | 1.00        | 0.998       | 0.500     | 0.002      |

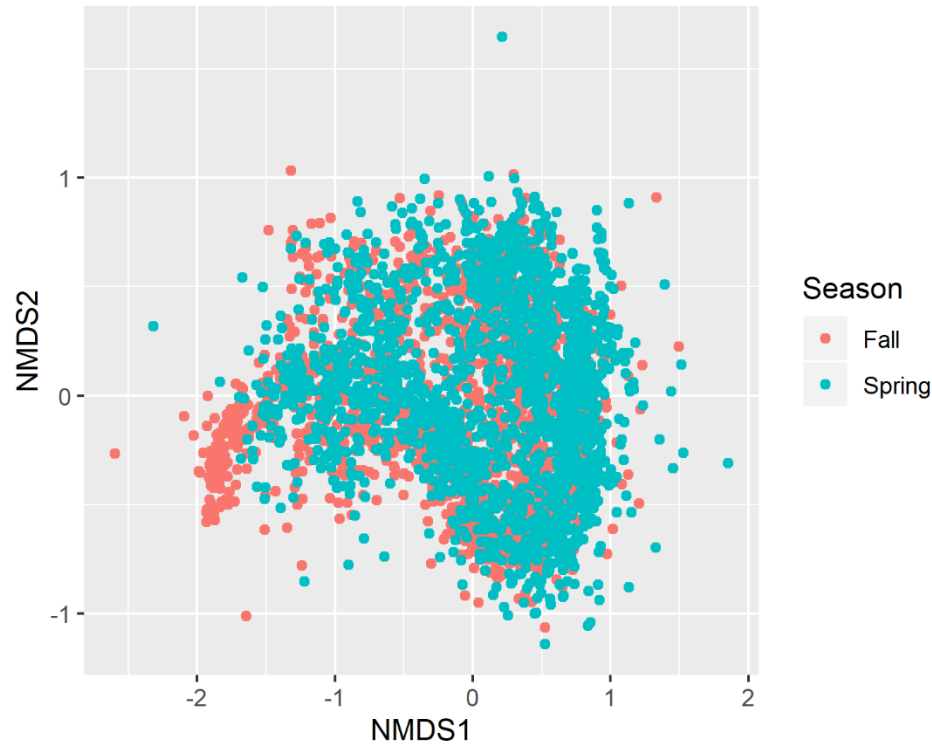

**Figure S1.** Non-metric multidimensional scaling ordination comparing community structure of demersal fish and benthic invertebrates between spring and fall bottom trawl surveys along Newfoundland and Labrador. Points represent community data aggregated to 4-km grid cells.

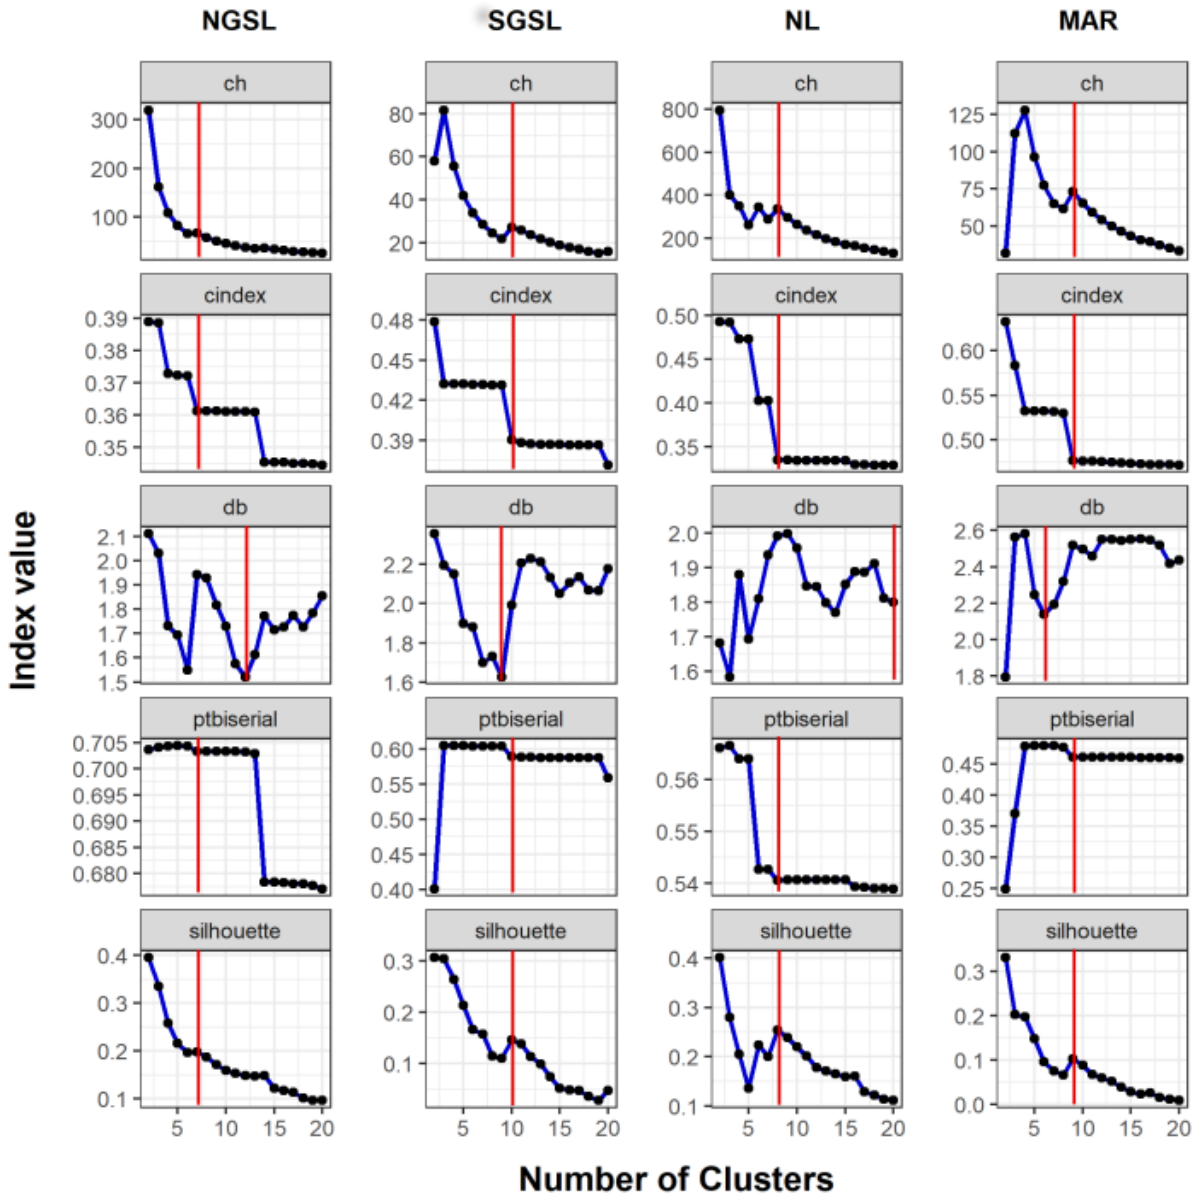

**Figure S2.** Value of various internal cluster validity indices for differing hierarchical clustering solutions ( $k = 2 - 20$ ) grouping observations in dendrograms based on similarity of taxonomic composition in 4 regions of the Northwest Atlantic: NGSL, SGSL, NL, MAR (see Table S1 caption for regional abbreviations). ch = Calinski-Harabasz index, cindex = C index, db = Davies-Bouldin index, ptbserial = Point-Biserial index, silhouette = Silhouette index. Red vertical lines indicate local optima for a given index.

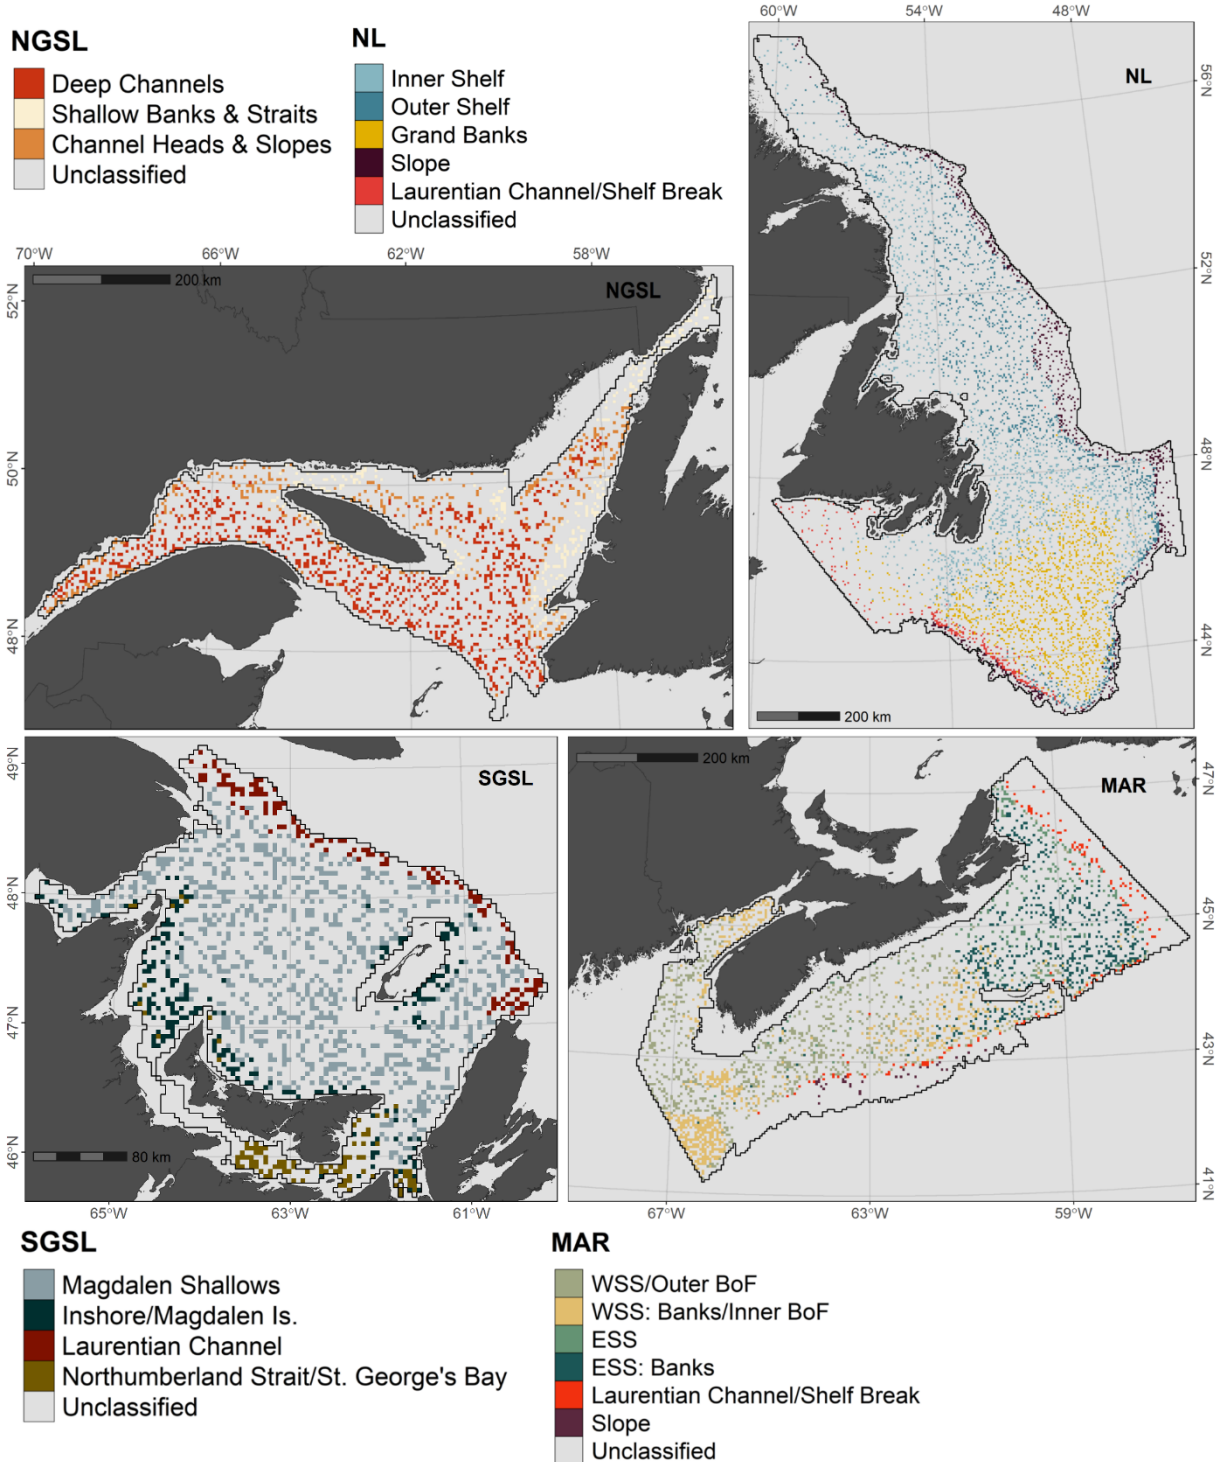

**Figure S3.** Distribution of predominant assemblages of demersal fish and benthic invertebrates in each of 4 regions of the Northwest Atlantic: NGSL, SGSL, NL, and MAR (see Table S1 caption for regional abbreviations). Colours identify groupings of 4-km grid cells with similar taxonomic composition based on hierarchical clustering of annual multispecies trawl survey data. Light grey indicates cells lacking survey data or that did not group with a major cluster.

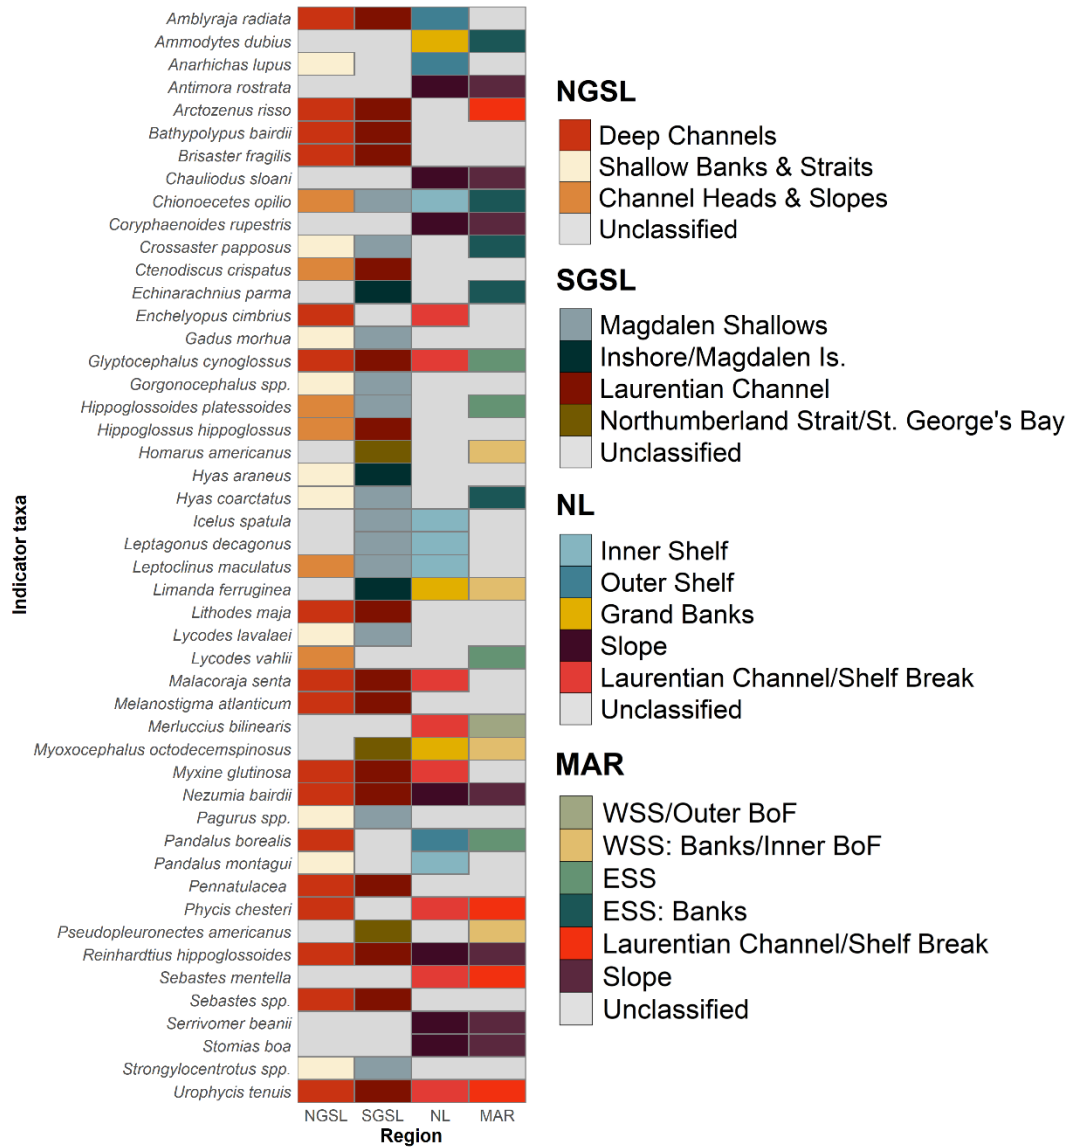

**Figure S4.** Indicator taxa identified as representative of predominant assemblage types of demersal fish and benthic invertebrates in 4 regions of the Northwest Atlantic: NGSL, SGSL, NL, and MAR (see Table S1 caption for regional abbreviations). Only taxa shared across multiple regions are shown. Cell colours indicate the regional assemblage type with which each taxa is associated.



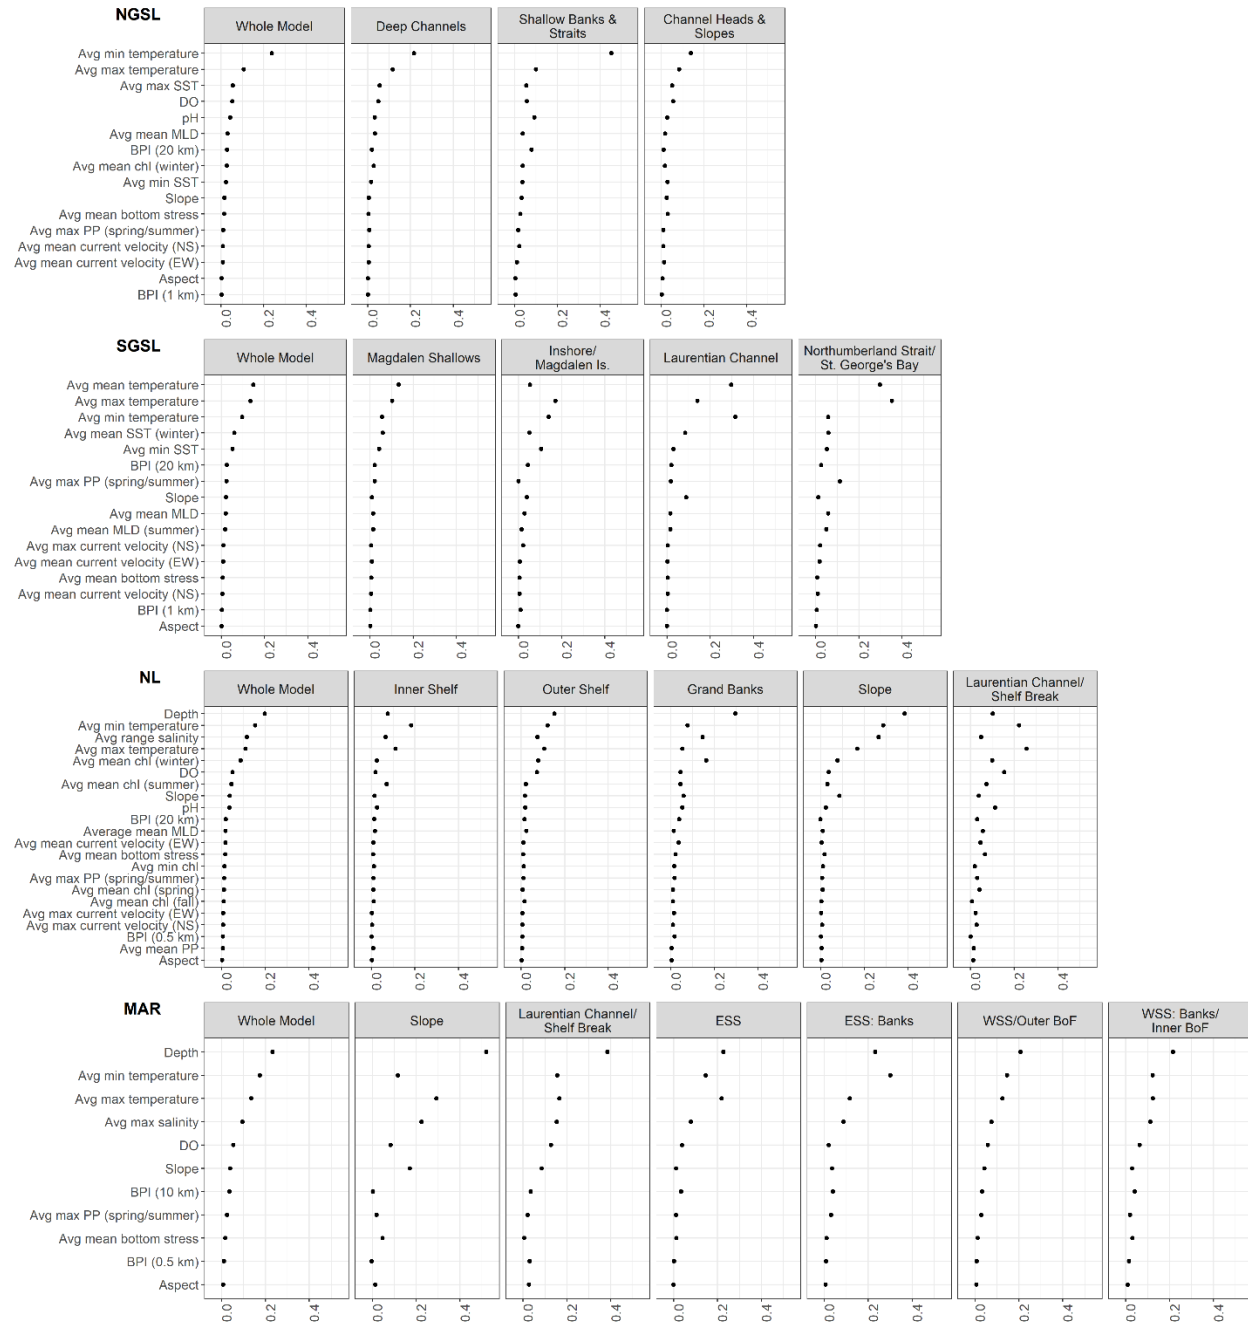

**Figure S5.** Class-specific variable importance plots indicating mean decrease in accuracy resulting from randomly permuting values of environmental predictors among observations used in the 4 regional random forest classifiers: NGSL, SGSL, NL, MAR (see Table S1 for regional abbreviations). Importance of variables to predictions for the whole model and for each assemblage type individually is indicated in separate panels. Variable summaries with prefix ‘Avg’ indicate averages across years with available data. Refer to Table S4 for details and data sources for individual variables.

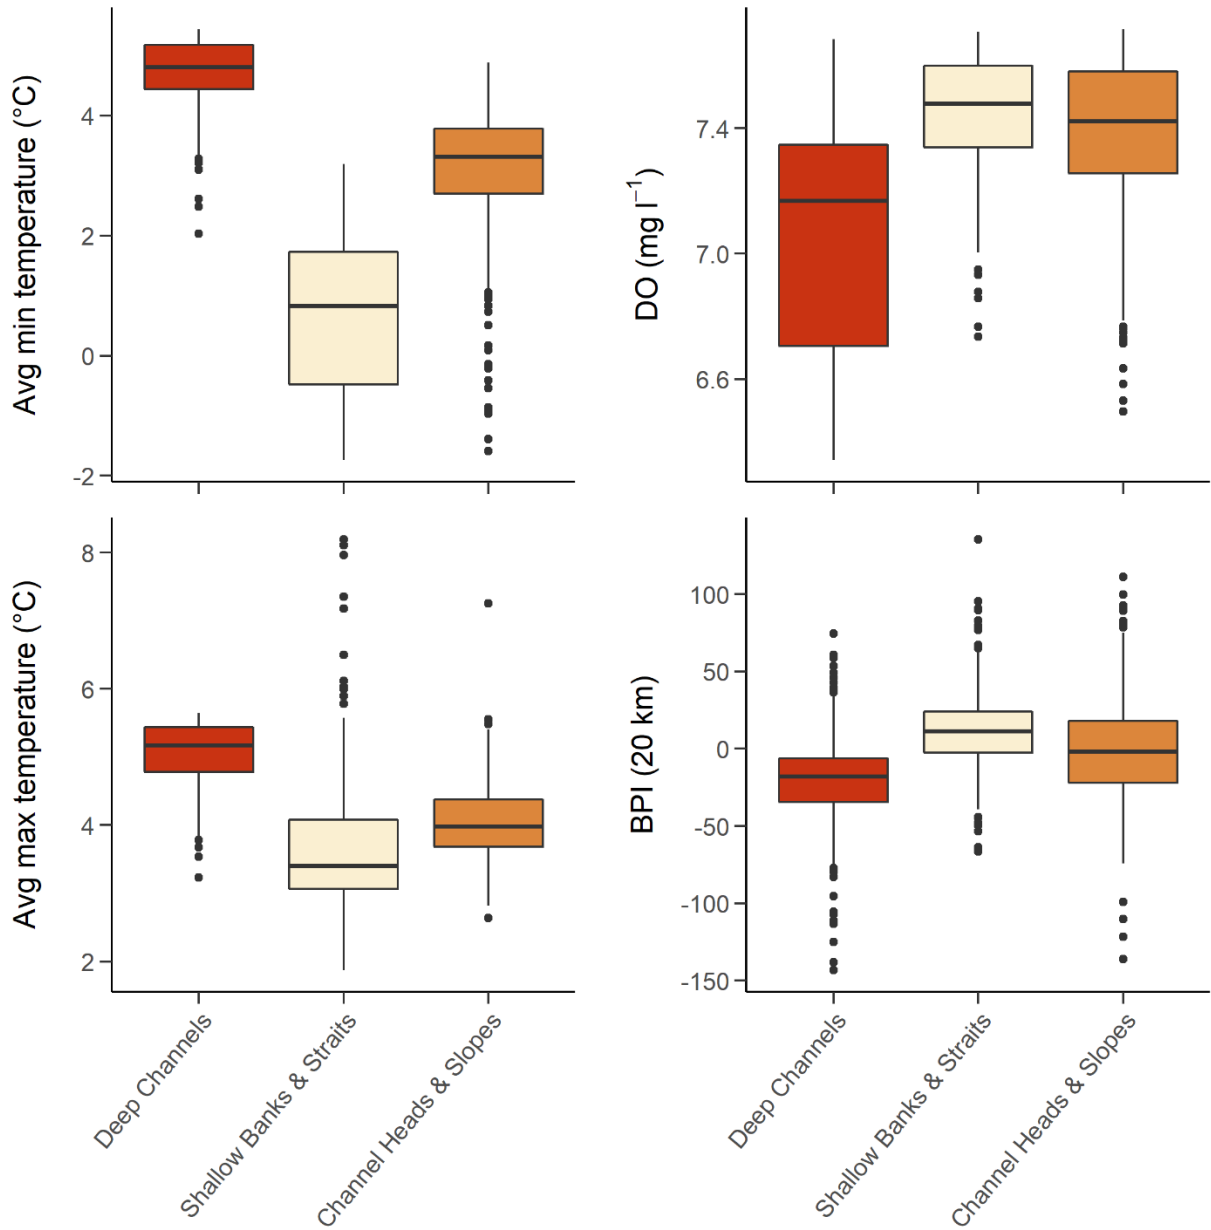

**Figure S6.** Characteristic environmental conditions occupied by the 3 predominant assemblage types in the Northern Gulf of St. Lawrence. Boxplots summarize the distribution of values for key environmental correlates with the spatial distribution of assemblages. Box lower edge, middle bar, and upper edge indicate the 25<sup>th</sup>, 50<sup>th</sup>, and 75<sup>th</sup> percentiles, respectively. Whiskers indicate most extreme values within 1.5 times the interquartile range of box edges. Individual points are outliers.

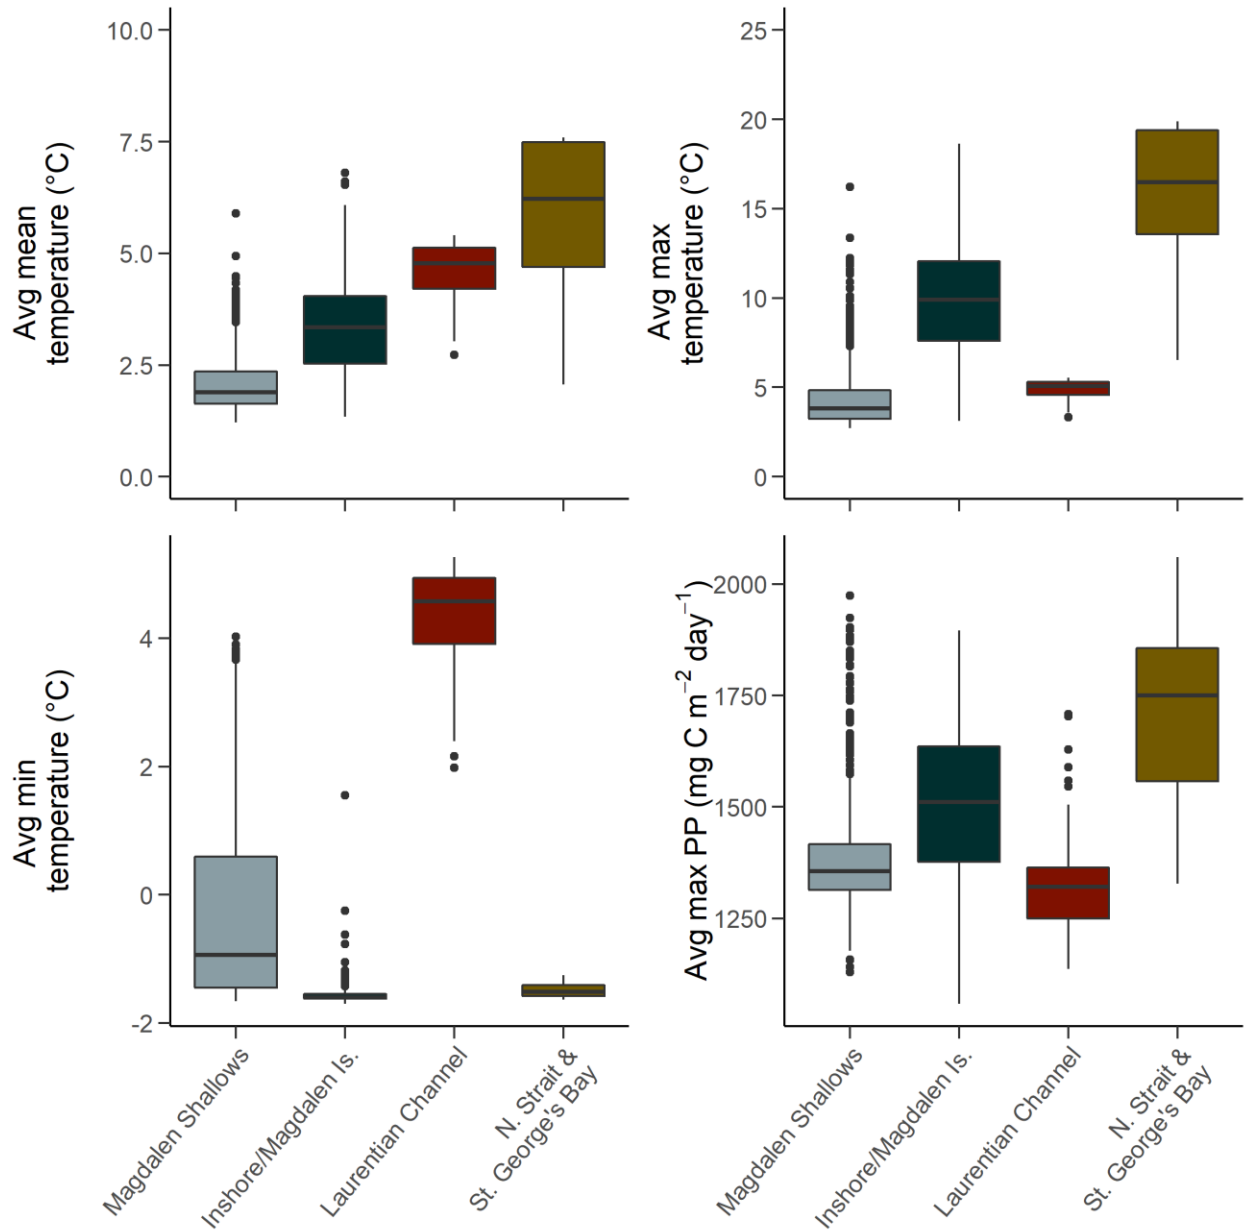

**Figure S7.** Characteristic environmental conditions occupied by the 4 predominant assemblage types in the Southern Gulf of St. Lawrence. Boxplots summarize the distribution of values for key environmental correlates with the spatial distribution of assemblages. Box lower edge, middle bar, and upper edge indicate the 25<sup>th</sup>, 50<sup>th</sup>, and 75<sup>th</sup> percentiles, respectively. Whiskers indicate most extreme values within 1.5 times the interquartile range of box edges. Individual points are outliers.

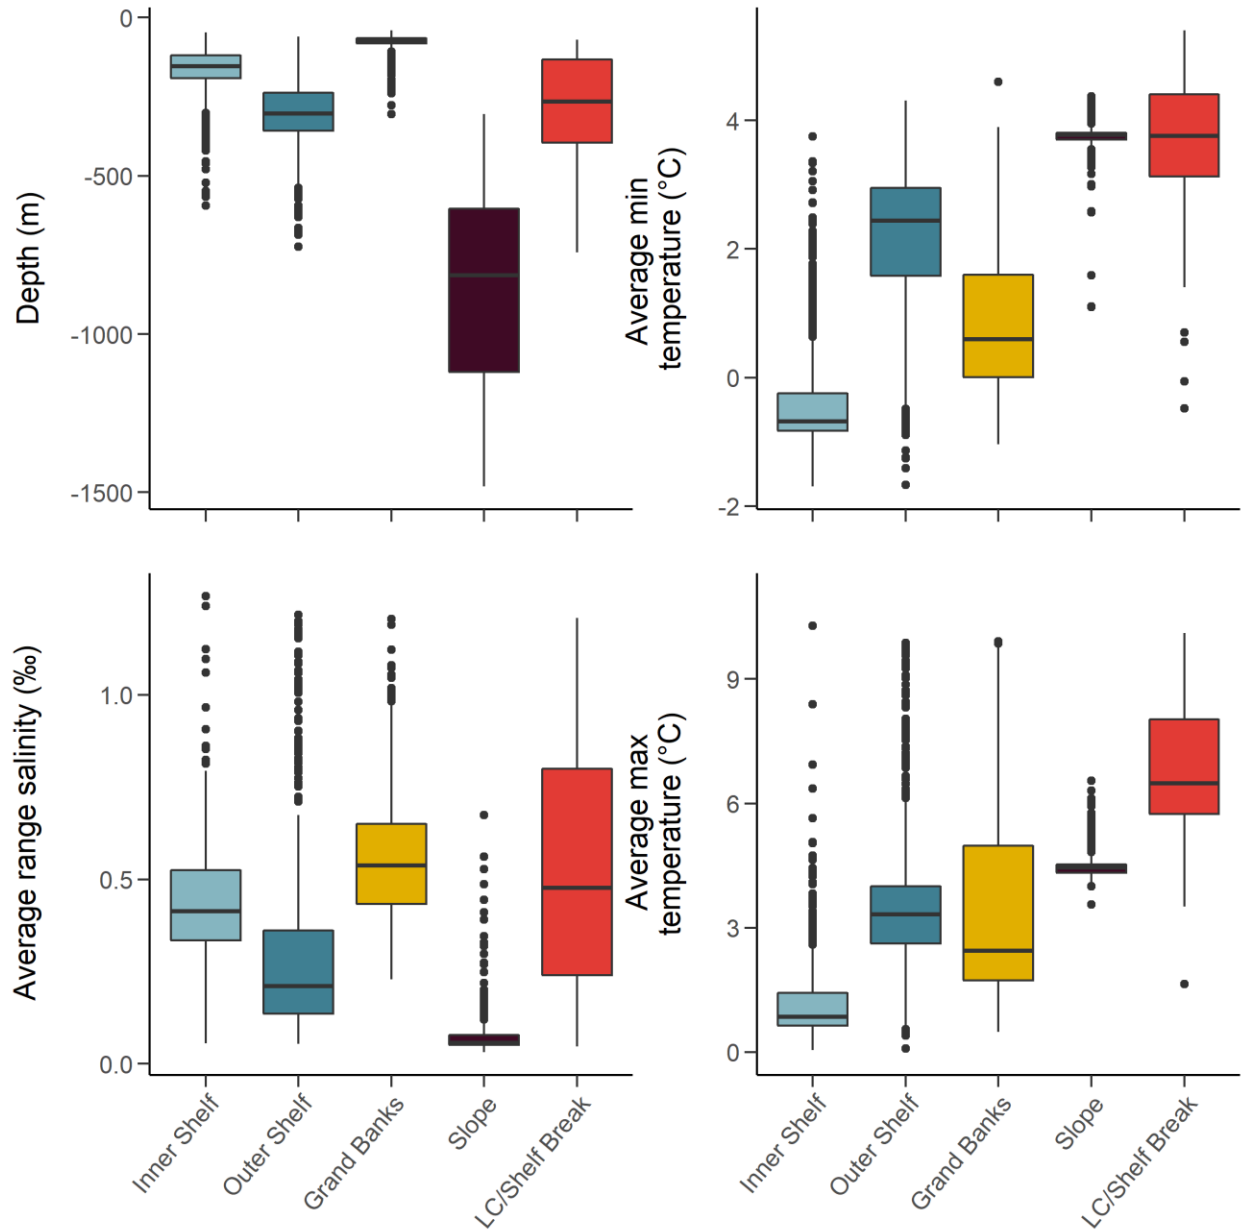

**Figure S8.** Characteristic environmental conditions occupied by the 5 predominant assemblage types in the Newfoundland & Labrador region. Boxplots summarize the distribution of values for key environmental correlates with the spatial distribution of assemblages. Box lower edge, middle bar, and upper edge indicate the 25<sup>th</sup>, 50<sup>th</sup>, and 75<sup>th</sup> percentiles, respectively. Whiskers indicate most extreme values within 1.5 times the interquartile range of box edges. Individual points are outliers.

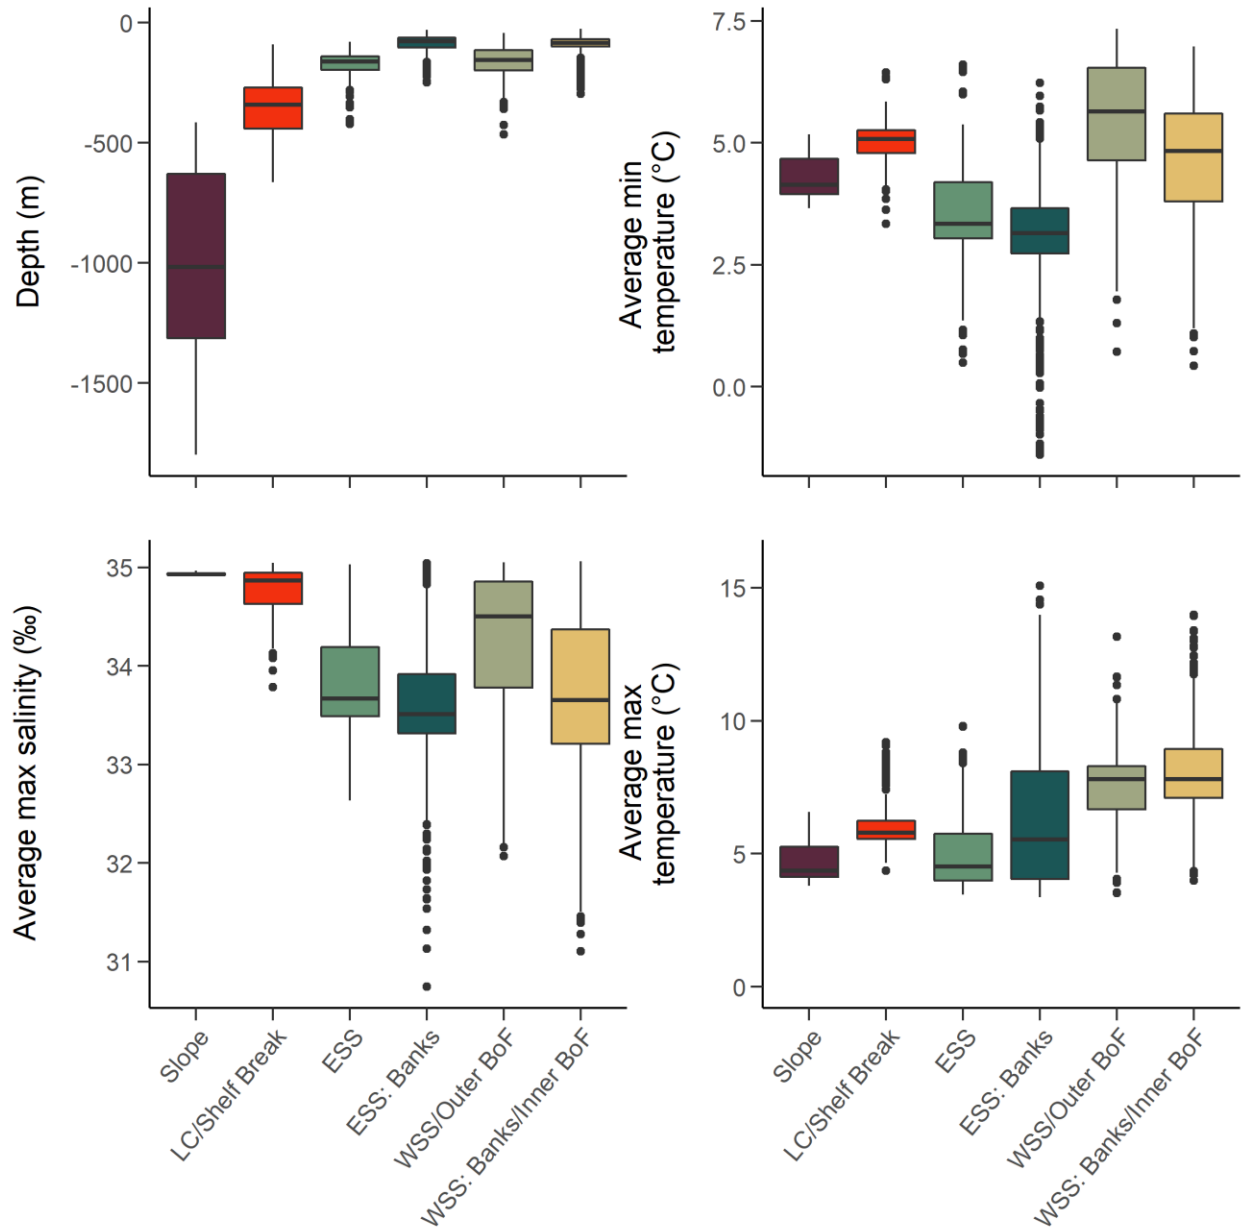

**Figure S9.** Characteristic environmental conditions occupied by the 6 predominant assemblage types in the Maritimes region. Boxplots summarize the distribution of values for key environmental correlates with the spatial distribution of assemblages. Box lower edge, middle bar, and upper edge indicate the 25<sup>th</sup>, 50<sup>th</sup>, and 75<sup>th</sup> percentiles, respectively. Whiskers indicate most extreme values within 1.5 times the interquartile range of box edges. Individual points are outliers.

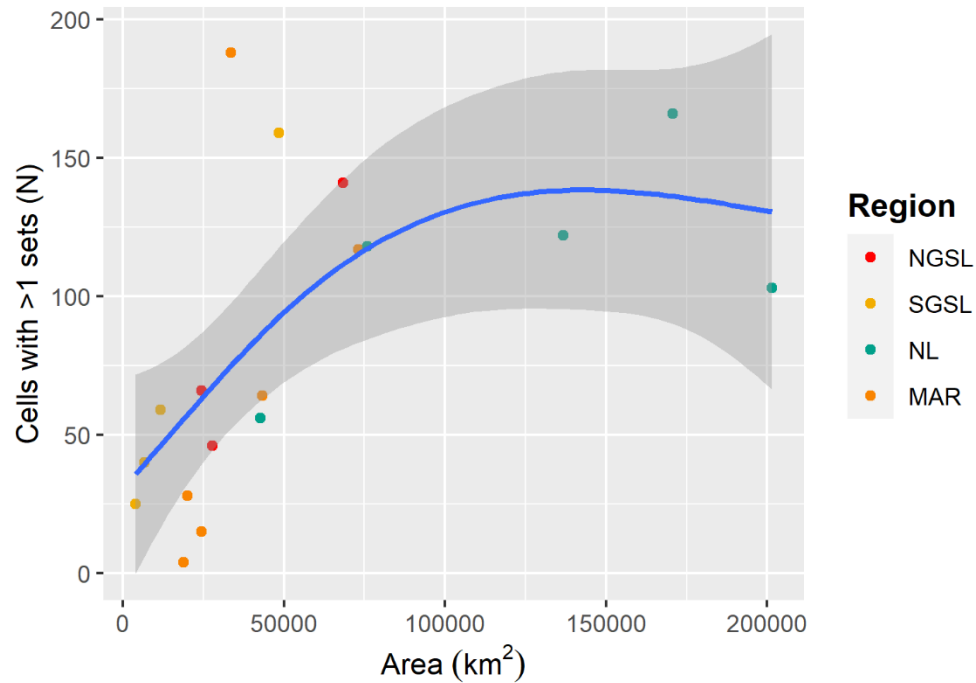

**Figure S10.** Frequency of grid cells with multiple trawl sets from across multiple years over the period 2007 to 2017 in each cluster (assemblage type) in relation to areal footprint of that cluster (km<sup>2</sup>). Colours denote the region with which the cluster belongs (NGSL, SGSL, NL, MAR; see Table S1 caption for regional abbreviations). Blue line is a gam smoother with 95% CI in grey shade.

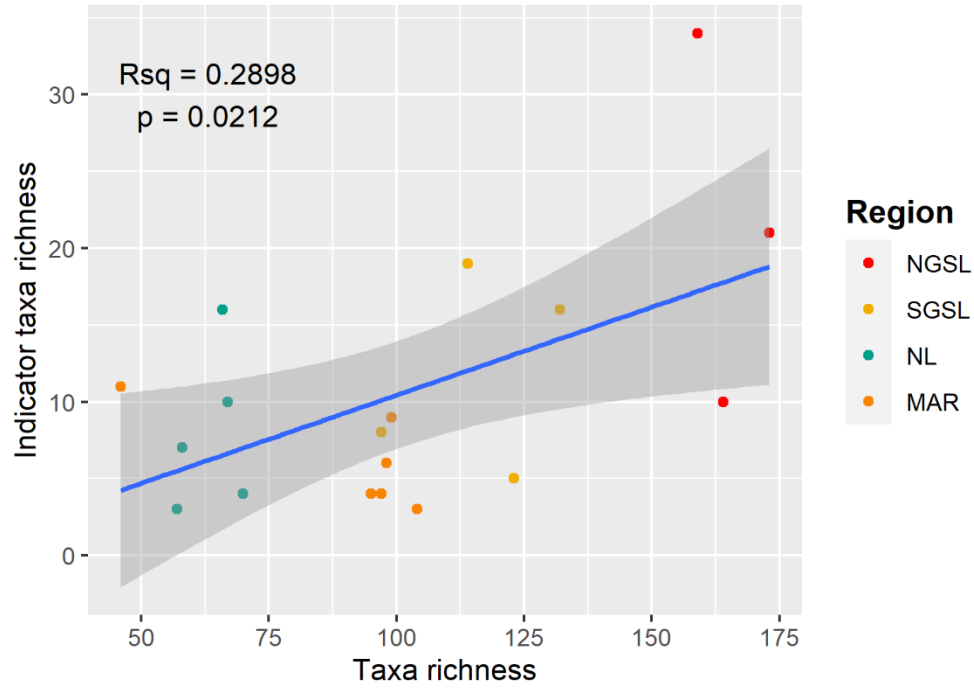

**Figure S11.** Relationship between number of indicator taxa characterizing a cluster (i.e., assemblage type) and the taxa richness associated with that assemblage. Colours denote the region with which the cluster belongs (NGSL, SGSL, NL, MAR; see Table S1 caption for regional abbreviations). Blue line is the linear regression relationship with 95% CI in grey shade.

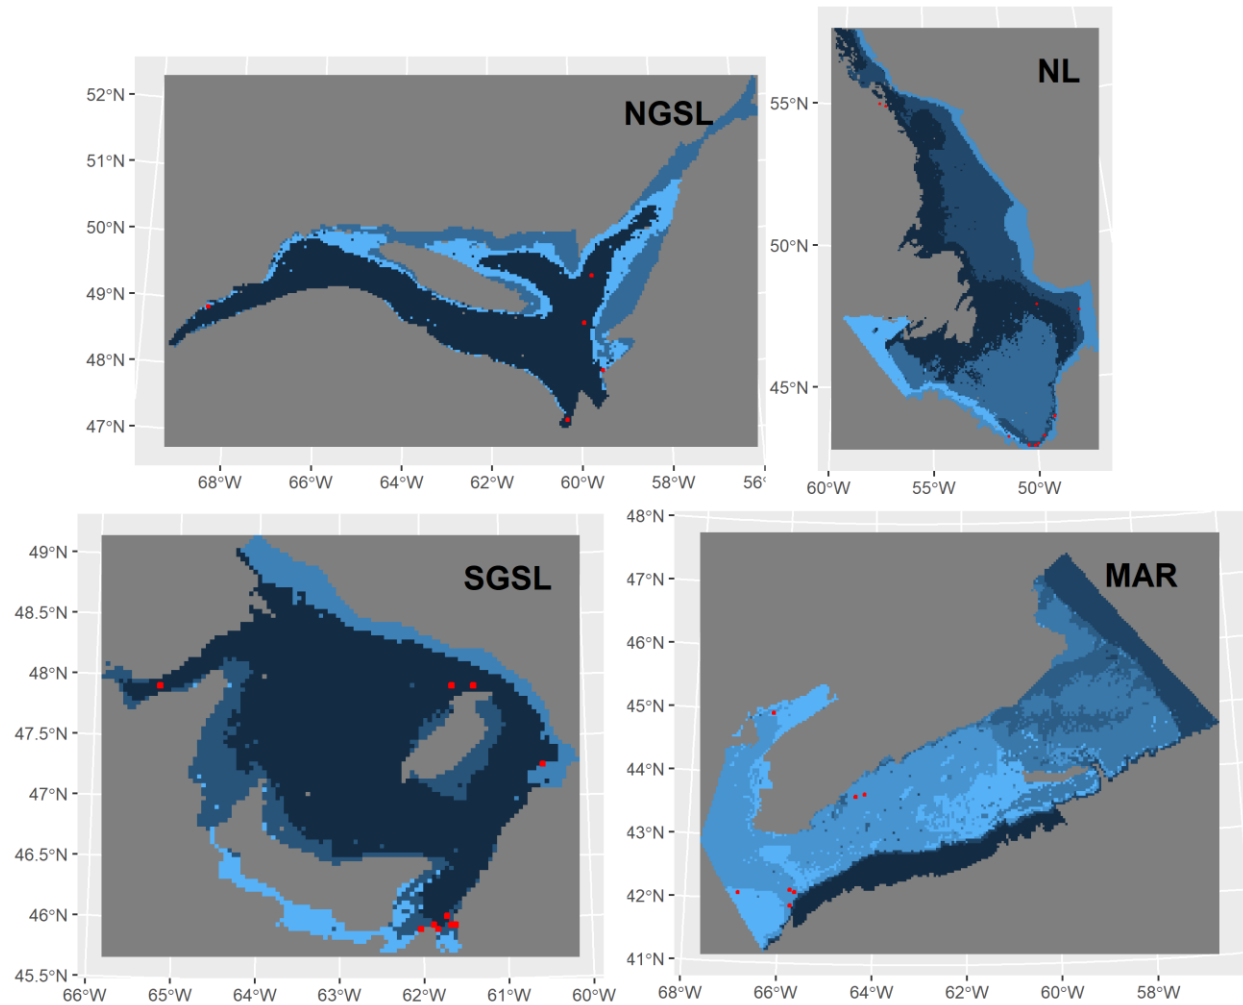

**Figure S12.** Spatial distribution of minor clusters (< 20 grid cells) with respect to the major assemblage types in each region (NGSL, SGSL, NL, MAR; see Table S1 caption for regional abbreviations). Grid cells belonging to minor clusters are highlighted in red. Blue tones indicate the predicted distribution of the major assemblage types in each region.



## Literature Cited

- Canadian Hydrographic Services (2004) Atlantic Bathymetric Compilation. CHS, Bedford Institute of Oceanography, Dartmouth, NS
- Fisheries and Oceans Canada (2021a) Primary Production Maps of the North Atlantic [Dataset]. Retrieved from <https://gcgeo.gc.ca/geonetwork/metadata/eng/08ea557c-5fc1-4f31-b0cd-863e614ef1a2>
- Fisheries and Oceans Canada (2021b) Satellite-derived Chlorophyll Maps of the North Atlantic [Dataset]. Retrieved from <https://gcgeo.gc.ca/geonetwork/metadata/eng/fadc644c-673344a3-9275-151df550c23c>
- GEBCO Compilation Group (2014) The GEBCO\_2014 Grid, version 201503318. Available at: [www.gebco.net](http://www.gebco.net). (accessed 15 January 2019)
- Platt T, Sathyendranath S, Forget M-H., White III GN, Caverhill C, Bouman H, Devred E, Son S (2008) Operational estimation of primary production at large geographical scales. *Remote Sens Environ* 112:3437-3448
- Tyberghein L, Verbruggen H, Pauly K, Troupin C, Mineur F, De Clerck O (2012) Bio-ORACLE: A global environmental dataset for marine species distribution modelling. *Glob Ecol Biogeogr* 21:272-281
- Wang Z, Lu Y, Greenan B, Brickman D, DeTracey B (2018) BNAM: An eddy-resolving North Atlantic Ocean model to support ocean monitoring. *Can Tech Rep Hydrogr Ocean Sci* 327:vii + 18p
